1 **Robust chronic convulsive seizures, high frequency oscillations, and**  
2 **human seizure onset patterns in an intrahippocampal kainic acid**  
3 **model in mice**

4  
5 Christos Panagiotis Lisgaras<sup>1, 2</sup> and Helen E. Scharfman\*<sup>1, 2</sup>

6  
7 <sup>1</sup>Departments of Child & Adolescent Psychiatry, Neuroscience & Physiology, and  
8 Psychiatry, and the Neuroscience Institute  
9 New York University Langone Health  
10 550 First Ave.  
11 New York, NY 10016

12  
13 <sup>2</sup>Center for Dementia Research  
14 The Nathan Kline Institute for Psychiatric Research  
15 New York State Office of Mental Health  
16 140 Old Orangeburg Road, Bldg. 35  
17 Orangeburg, NY 10962

18  
19 **Conflicts of interest:** None

20  
21 **\*Corresponding author:**

22 Helen E. Scharfman  
23 E-Mail: [hscharfman@nki.rfmh.org](mailto:hscharfman@nki.rfmh.org)  
24 The Nathan Kline Institute  
25 Center for Dementia Research  
26 140 Old Orangeburg Rd. Bldg. 35  
27 Orangeburg, NY 10962  
28 Phone: 845-398-5427  
29 Fax: 845-398-5422

30  
31 **Key Words:** Intrahippocampal kainic acid, Epilepsy, Seizures, Neuronal damage, High  
32 frequency oscillations, Mouse

33  
34 **Abbreviations:**

35 IHKA = Intrahippocampal kainic acid  
36 KA = Kainic acid  
37 TLE = Temporal lobe epilepsy  
38 LVF = Low-voltage fast  
39 HYP = Hypersynchronous  
40 HFOs = High frequency oscillations  
41 SE = Status Epilepticus  
42 vEEG = video electroencephalography

47 **HIGHLIGHTS**

48

49 • **Our implementation of the IHKA model led to robust chronic spontaneous**  
50 **convulsive seizures in mice**

51

52 • **Convulsive seizures were synchronized in both hippocampi and two**  
53 **cortical sites**

54

55 • **Seizure frequency increased from 2-4 wks to 10-12 wks in 50% of mice**  
56 **and declined in others**

57

58 • **Convulsive seizures fit LVF and HYP types found in human temporal lobe**  
59 **epilepsy**

60

61 • **HFOs (>250 Hz) were common, at >1 location, and were both ictal and**  
62 **interictal**

63

64

65

66 **ABSTRACT**

67

68 Intrahippocampal kainic acid (IHKA) has been widely implemented to simulate  
69 temporal lobe epilepsy (TLE), but evidence of robust seizures is usually limited. To  
70 resolve this ambiguity, we slightly modified previous methods and employed continuous  
71 wideband video-EEG monitoring from 4 recording sites to best detect and characterize  
72 chronic epilepsy outcomes in both male and female mice. We found many more  
73 convulsive seizures than most studies have reported. Mortality was low. Analysis of  
74 convulsive seizures at 2-4 and 10-12 wks post-IHKA showed a robust frequency (2-4  
75 per day on average) and duration (typically 20-30 sec) at each time. Comparison of the  
76 two timepoints showed that seizure burden became more severe in approximately 50%  
77 of the animals. We show that almost all convulsive seizures could be characterized as  
78 either low-voltage fast or hypersynchronous onset seizures, which has not been  
79 reported in a mouse model of epilepsy and is important because these seizure types  
80 are found in humans. In addition, we report that high frequency oscillations (>250 Hz)  
81 occur, resembling findings from IHKA in rats and TLE patients. Pathology in the  
82 hippocampus at the site of IHKA injection was similar to mesial temporal lobe sclerosis  
83 and reduced contralaterally. In summary, our methods produce a model of TLE in mice  
84 with robust convulsive seizures, and there is variable progression. HFOs are robust  
85 also, and seizures have onset patterns and pathology like human TLE.

86

87

88

89

90

91

92

93

94

95

96

97

98

99

100

101

102

103

104

105

106

107

108

109

110

111

## 112 **SIGNIFICANCE STATEMENT**

113

114 Although the IHKA model has been widely used in mice for epilepsy research, there  
115 is variation in outcomes, with many studies showing few robust seizures long-term,  
116 especially convulsive seizures. We present an implementation of the IHKA model with  
117 frequent convulsive seizures that are robust, meaning they are >10 sec and associated  
118 with complex high frequency rhythmic activity recorded from 2 hippocampal and 2  
119 cortical sites. Seizure onset patterns usually matched the low-voltage fast and  
120 hypersynchronous seizures in TLE. Importantly, there is low mortality, and both sexes  
121 can be used. We believe our results will advance the ability to use the IHKA model of  
122 TLE in mice. The results also have important implications for our understanding of  
123 HFOs, progression, and other topics of broad interest to the epilepsy research  
124 community. Finally, the results have implications for preclinical drug screening because  
125 seizure frequency increased in approximately half of the mice after a 6 wk interval,  
126 suggesting that the typical 2 wk period for monitoring seizure frequency is insufficient.

127

## 128 **INTRODUCTION**

129

130 Temporal lobe epilepsy (TLE) is the most common type of focal epilepsy in adults  
131 (Thijs et al., 2019), with up to 30% of the patients achieving poor seizure control by  
132 currently available anti-seizure drugs (ASDs; Kwan et al., 2011; Kapur et al., 2019).  
133 Moreover, several comorbidities challenge the quality of life of patients and their families  
134 (Keezer et al., 2016; Ravizza et al., 2017). As a result, it is important to facilitate  
135 research to identify new therapeutic targets, and to that end, animal models of epilepsy  
136 have played a key role (Holmes, 2007; Löscher, 2017; Pitkänen, 2017). Kainic acid (KA)  
137 has been used for decades in rats (Ben-Ari and Lagowska, 1978; Nadler et al., 1978;  
138 Schwarcz et al., 1978; Nadler, 1981; Ben-Ari and Cossart, 2000; Lévesque and Avoli,  
139 2013), where it can induce status epilepticus (SE), a pattern of neuronal loss similar to  
140 human TLE (mesial temporal sclerosis; MTS; (Houser, 1999; Scharfman, 2007;  
141 Blümcke et al., 2012; Thom, 2014), and spontaneous recurrent seizures (epilepsy),  
142 most of which are convulsive (Williams et al., 2007; Lévesque and Avoli, 2013).

143 Although useful as a rat model of TLE, there often was mortality during or shortly  
144 after SE. Mortality was decreased by the use of anticonvulsants 1-2 hrs after SE  
145 (Scharfman et al., 2000; Scharfman et al., 2002) or by the use of repetitive low dosing  
146 (Meier and Dudek, 1996). However, there has been a major shift away from use of KA  
147 in rats to the use of KA in mice, a result of the powerful methods that were tailored for  
148 mice and can be used in epilepsy research.

149 Initial studies of mice often injected KA systemically. Unfortunately, initial studies in  
150 mice showed high mortality after systemic injection (Schauwecker and Steward, 1997).  
151 Use of anticonvulsants before KA led to reduced mortality (Iyengar et al., 2015) but the  
152 degree of hippocampal neuronal loss was sometimes weak even if electrographic SE  
153 lasted for several hours (Iyengar et al., 2015). In some studies, neuronal loss was  
154 greater (VonDran et al., 2014) but studies of long-term consequences showed that there  
155 were few spontaneous seizures (McKhann et al., 2003). Investigators tried to inject KA  
156 into the hippocampus instead and found pathology like MTS (Bouilleret et al., 1999). In  
157 addition, there was robust GC dispersion (GCD) which is also found in human TLE

158 (Houser, 1992). The pathology following IHKA was useful because it simulated the  
159 cases of TLE where there is unilateral hippocampal sclerosis. In contrast, prior studies  
160 of systemic KA in rats produced severe pathology in both hippocampi. Another benefit  
161 of IHKA was low mortality (Bouilleret et al., 1999; Riban et al., 2002).

162 However, chronic convulsive seizures in the wks and months after IHKA in mice  
163 were not discussed in detail (Bouilleret et al., 1999; Riban et al., 2002) so the frequency  
164 and severity were not clear. EEG recordings from the site of IHKA injection showed that  
165 most frequent epileptiform abnormalities in mice were short-lasting non-convulsive  
166 episodes (Bouilleret et al., 1999; Maroso et al., 2011). Brief (3-7 sec) abnormalities were  
167 reported by others where they could be as frequent as 100 per hr (Kim et al., 2018;  
168 Sandau et al., 2019; Lai et al., 2020). Sometimes the EEG examples that were  
169 published suggested trains of spikes or epileptiform activity occurred in the wks after  
170 IHKA, but seizures were either rare, not shown, or the evidence that they occurred was  
171 not strong (e.g., Kiasalari et al., 2016; Zhu et al., 2016; Runtz et al., 2018; Bielefeld et  
172 al., 2019; Li et al., 2020). One study that described methods for IHKA in mice concluded  
173 that IHKA did not lead to epilepsy (Bielefeld et al., 2017).

174 In addition to these problems, there have been other questions about the IHKA  
175 model in mice. For example, one lead is often used for the EEG and it is placed where  
176 KA was injected, without recording from other brain areas. This may lead to difficulty  
177 assessing how much the seizures spread beyond the hippocampus and mistaken  
178 interpretation that seizures are focal. How many seizures were convulsive and how  
179 many were non-convulsive is not always clear. In addition, many studies occurred  
180 before the mandate at the National Institutes of Health (NIH) to study both sexes  
181 (Clayton and Collins, 2014), and this mandate is not in place outside the U.S. Therefore,  
182 most published data have used males.

183 To address these issues, we modified the IHKA procedure to produce frequent  
184 convulsive seizures while maintaining low mortality. We report the characteristics of  
185 these seizures that make them robust, such as multiple seizures per day or wk, severity  
186 in that most fit Racine scale 4-5, long duration (up to 100 sec), and postictal depression,  
187 a hallmark of convulsive seizures in TLE (So and Blume, 2010). We also report data for  
188 non-convulsive seizures and both sexes.

189 We also addressed other questions about IHKA in mice. For example, despite the  
190 report that post-IHKA epileptiform activity may change with time (Riban et al., 2002;  
191 Häussler et al., 2016), data about chronic seizures over time is limited, especially  
192 beyond 2 months post-IHKA (Henshall, 2017). Two studies mentioned in the text that  
193 convulsive seizures occurred many months after IHKA but data were not shown  
194 (Bouilleret et al., 1999; Bui et al., 2018). In contrast, quantified data from rats after  
195 systemic KA showed that spontaneous seizures increased over the first 6 months after  
196 IHKA injection from ~9 per wk up to 50 per wk (Rattka et al., 2013). Therefore, we  
197 quantified seizures occurring 2-4 and 10-12 wks following IHKA injection. Remarkably,  
198 we show that approximately half of the mice exhibited a rise in seizure frequency  
199 whereas the other half declined.

200 Another question we addressed is the degree seizure types found in human TLE  
201 are also observed in the IHKA model. The seizures in humans have been characterized  
202 according to the pattern of the EEG during the initial phase of the seizure, called the  
203 seizure onset pattern. From a translational perspective, the identification of different

204 seizure onset patterns is important because the type of seizure onset appears to  
205 correlate with the size of the seizure onset zone (Avoli et al., 2016) and may predict  
206 post-surgical outcomes (Zaher et al., 2020). The different seizure onset patterns are still  
207 being debated (Velasco et al., 2000; Perucca et al., 2014; Gnatkovsky et al., 2019;  
208 Saggio et al., 2020), but there appears to be a consensus that at least two types exist:  
209 low-voltage fast (LVF) or hypersynchronous (HYP) seizures (Lévesque et al., 2012;  
210 Gnatkovsky et al., 2019). Although LVF and HYP seizures have been identified in IHKA-  
211 treated rats (Bragin et al., 2005), pilocarpine-treated rats (Behr et al., 2017), 4-  
212 aminopyridine or picrotoxin-treated rats (Salami et al., 2015) and slices of mice (Shiri et  
213 al., 2016), their presence in IHKA-treated mice has been unclear. This is an important  
214 gap because presently IHKA in mice is very common in studies of TLE. We show that  
215 almost all seizures in our IHKA-treated mice fit either the LVF or HYP classification.

216 In humans with TLE, high frequency oscillations (HFOs) are of great interest  
217 because they appear at seizure onset and may mark the best area for removal in  
218 surgical resection for intractable TLE (Zijlmans et al., 2012). Although observed in  
219 IHKA-treated rats (Bragin et al., 1999a), HFOs have not been described in epileptic  
220 mice to our knowledge. Furthermore, an important question is whether HFOs are  
221 confined to the focus, which is assumed to be the KA injection site in the IHKA model  
222 (Bouilleret et al., 1999; Riban et al., 2002). In addition, prior studies using one recording  
223 electrode at the injection site limited the assessment of seizure focus. We examined  
224 when HFOs occur, and where they occur.

225 In summary, we employed a slightly different approach to induce SE using IHKA  
226 and used continuous (24 hrs per day, 7 days per wk) wideband video-EEG (vEEG)  
227 monitoring from 4 recording electrodes at 2 different timepoints after IHKA. We asked  
228 several questions about our IHKA treated mice: 1) Were there frequent convulsive  
229 seizures? Did they generalize? Were non-convulsive seizures present? 2) Were  
230 seizures characterized by an onset pattern similar to LVF or HYP seizures? 3) Did  
231 seizures progress or remit? 4) Were there HFOs, and if so, where and when? Did HFOs  
232 mark a focus, and where was the focus? In addition, we examined hippocampal  
233 pathology to determine if it was similar to past reports of the IHKA model, i.e., MTS  
234 (Bouilleret et al., 1999). Finally, we made observations in both sexes to determine if  
235 there were sex differences.

236

## 237 **MATERIALS AND METHODS**

238

### 239 **I. Animals, breeding, genotyping and animal care**

240 The number of animals used for the present study is summarized in **Table 1**. All  
241 experimental procedures were performed in accordance with the NIH guidelines and  
242 approved by the Institutional Animal Care and Use Committee at the Nathan Kline  
243 Institute.

244 *Amigo2*-Cre transgenic mice were kindly provided by Dr. Steven Siegelbaum at  
245 Columbia University (Hitti and Siegelbaum, 2014). Hemizygous *Amigo2*-Cre males were  
246 bred to C57BL/6 females (Stock number 027, Charles River Laboratories). *Amigo2*-  
247 Cre<sup>+/-</sup> and *Amigo2*-Cre<sup>-/-</sup> adult males and females were used for experiments in  
248 anticipation of future closed-loop seizure intervention studies using this transgenic

249 mouse line. Note that there was no effect of genotype on acute and chronic outcomes  
250 as described in more detail in **Table 2**.

251 Prior to IHKA injection, mice were housed 2-4 per cage in standard laboratory  
252 cages and after IHKA injection they were housed 1 per cage. Animals were handled  
253 daily by the experimenter when they were single housed to reduce behavioral stress  
254 related to the lack of social housing (Bernard, 2019; Manouze et al., 2019). Cages were  
255 filled with corn cob bedding and there was a 12 hr light:dark cycle (7:00 a.m. lights on,  
256 7:00 p.m. lights off). Red plastic mini igloos (W.F. Fisher) were placed at the base of the  
257 cage to provide a location that was partially hidden for the mice. This was done to  
258 reduce behavioral stress. Food (Purina 5001, W.F. Fisher) and water was provided ad  
259 libitum.

260 All breeding pairs were fed Purina 5008 rodent chow (W.F. Fisher) and provided  
261 with one 2"x 2" nestlet (W.F. Fisher). Mice were weaned on postnatal day 23-30, and  
262 after that time the chow was Purina 5001 (W.F. Fisher).

263 Genotyping was done using tail samples collected at approximately 23-30 days of  
264 age. Genotyping was performed by the Mouse Genotyping Core Laboratory at New  
265 York University Langone Medical Center.

266 Although this study used *Amigo2*-Cre mice we do not think the presence of Cre  
267 recombinase in cells expressing *Amigo2* influenced the results. One reason is that our  
268 results from *Amigo2*-Cre<sup>+/+</sup> and *Amigo2*-Cre<sup>-/-</sup> mice were similar in several acute  
269 (during SE) and chronic (during chronic seizures) outcome measures as described in  
270 more detail in **Table 2**. In addition, *Amigo2* has been localized only to CA2 pyramidal  
271 cells and hilar neurons (Hitti and Siegelbaum, 2014), which is a small fraction of  
272 neurons in the brain. However, it is notable that in studies of others, *DLX*-Cre<sup>+/+</sup>-mice did  
273 appear to have more seizures than *DLX*-Cre<sup>-/-</sup> mice despite the absence of viral  
274 injection to experimentally manipulate cells expressing *DLX* (Kim et al., 2013). Other  
275 laboratories have used Cre<sup>+/+</sup> lines without viral expression in their research, however,  
276 and it has not been shown that hemizygous Cre on its own has major effects on  
277 endpoints we investigated, e.g., seizures after SE.

278

## 279 **II. Kainic acid (KA) injection**

### 280 A. KA preparation

281 KA monohydrate (#0222, Tocris Bioscience) was dissolved in 0.9% sterile saline  
282 and pH was adjusted to 7.4 with 20-30  $\mu$ l 1 N NaOH (#SS266-1, Fisher Scientific)  
283 according to Tocris Bioscience's guidelines. The final concentration of the stock solution  
284 was 20 mM and it is similar to the concentration used by other investigators (Bui et al.,  
285 2018; Zeidler et al., 2018; Li et al., 2020). The stock solution was then sonicated for 1 hr  
286 to ensure good solubility as indicated in the manufacturer's recommendations. After  
287 sonication, the solution was aliquoted in 0.5 ml portions and kept at -80°C for a  
288 maximum of 1 month. On the day of IHKA injection, an aliquot was allowed to come to  
289 room temperature, and the solution was sonicated for 30 min before the start of the  
290 surgical procedure. The aliquot was discarded after use and a new aliquot was used on  
291 the day of every experiment. Using this approach, we did not notice any precipitation at  
292 any step of KA preparation.

293

294

## 295 B. Stereotaxic injection of KA

296 At approximately 8 wks of age, mice were injected with KA and then implanted with  
297 electrodes 10 days or 9 wks later (see methods for KA injection in the next paragraph  
298 and implantation in section IV), which was 4-7 days before starting vEEG monitoring.  
299 Although implantation at 10 days after IHKA may have altered epileptogenesis, animals  
300 exhibited spontaneous seizures in their home cage by 10 days after IHKA, so epilepsy  
301 had already developed. Furthermore, in our experience, implantation reduces seizures  
302 rather than increasing them (Jain et al., 2019), so it is likely that our results  
303 underestimate (rather than overestimate) seizures. This is important because our goal  
304 was to show robust seizures rather than few, equivocal seizures. Note that implantation  
305 prior to IHKA injection would have potentially allowed detailed recordings of SE, but that  
306 was not the major focus of this study. Moreover, prior implantation can reduce seizures  
307 as mentioned above, so it was avoided.

308 To begin the procedure, the 8 wk-old mice were brought to the laboratory for  
309 acclimation to the location where KA would be injected. Acclimation typically included  
310 two 5 min-long sessions per day for the 2 days before IHKA injection. In each session,  
311 the investigator who would be injecting KA conducted the acclimation. For acclimation,  
312 the mouse was removed from the cage using gloves and the mouse was allowed to  
313 walk on the part of the lab coat covering the lower forearm. One M&M (chocolate-  
314 coated peanut) was used as a food reward.

315 KA was injected between 8 a.m.-1 p.m. Mice were anesthetized with 3% isoflurane  
316 (Aerrane, Henry Schein) for 2 min in a rectangular transparent plexiglass box (induction  
317 chamber) and then transferred to a stereotaxic apparatus (Model #502063, World  
318 Precision Instruments). Anesthesia was then lowered to 1-2%. Mice were frequently  
319 monitored to confirm there was adequate respiration and there was no reflex in  
320 response to a toe pinch. Mice were placed on top of a homeothermic blanket (Model  
321 #50-7220F, Harvard Apparatus) and body temperature was maintained at 37°C by  
322 feedback from a lubricated probe inserted into the rectum. Eye ointment was applied to  
323 prevent dehydration (Artificial tears, Pivotal). The scalp was shaved and swabbed with  
324 Betadine (Purdue Products) using sterile cotton-tipped applicators (Puritan) followed by  
325 70% ethanol. A midline incision exposing the skull surface was made with a sterile  
326 scalpel and the skull was cleaned with sterile saline.

327 One burr hole was drilled using a drill bit (Model #514552, 60 mm, Stoelting)  
328 mounted to a surgical drill (Model C300, Grobert) above the left hippocampus.  
329 Stereotaxic coordinates for the burr hole were (-2 mm anterior-posterior (A-P) to  
330 Bregma, - 1.25 mm medio-lateral (M-L)). Care was taken to leave the dura mater intact  
331 by regularly monitoring it with a stereoscope during drilling (Stemi SV6, Zeiss). The  
332 drilling area was regularly hydrated with 0.9% sterile saline solution and drilling was  
333 done in steps to avoid depressing the underlying tissue during drilling. This approach  
334 was followed because we measured the dorso-ventral (D-V) zero point from dural  
335 surface, so we wanted the measurement of the dural surface to be as accurate as  
336 possible.

337 Next, a 0.5 ml Hamilton syringe (Model 7001, Hamilton) was lowered from brain  
338 surface 1.6 mm into the left dorsal hippocampus (-1.6 mm D-V) and 70-100 nL of 20  
339 mM KA dissolved in 0.9% sterile saline was manually injected over approximately 5 min.  
340 A range of IHKA volumes were used instead of a fixed volume because in pilot studies



341 all doses were successful in triggering robust convulsive SE with minimal  
342 (approximately 20%) acute (during SE) mortality (see the legend for **Table 2** for a  
343 detailed explanation). The speed was controlled by depressing the syringe 1 unit (10  
344 nL) every 15 sec. The needle remained in place for an additional 3 min and was then  
345 slowly removed to prevent backflow of the injected solution. The incision was quickly  
346 closed using tissue adhesive (Vetbond, 3M). Mice were transferred to a clean cage on  
347 an autoclaved paper towel (without bedding) and placed over a 37°C heating pad. After  
348 approximately 3-4 hrs of monitoring the animal, bedding was used instead of the towel.

349

### 350 **III. Behavioral monitoring of IHKA-induced status epilepticus (SE)**

351 Behavior during IHKA-induced SE was visually monitored and seizure severity  
352 during SE was scored using stages 1-5 of the Racine scale (Racine, 1972) and stages  
353 6-7 using the Pinel and Ronver scale (Pinel and Rovner, 1978) because all stages were  
354 observed in our experiments. Using the scale with stages 1-7, stages 1-2 were  
355 considered non-convulsive and stages 3 and higher were considered convulsive. Stage  
356 1 was accompanied by intense mastication and facial movements such as blinking,  
357 repetitive ear movements, a sudden change in the behavior to a frozen stance. Stage 2  
358 was head nodding. Stage 3 was unilateral forelimb clonus, stage 4 was bilateral  
359 forelimb clonus with rearing, and stage 5 was a stage 4 seizure with loss of postural  
360 tone. Stage 6 seizures were accompanied by jumping or repetitive falling and stage 7  
361 included vigorous jumping and running around the cage. Notably, all IHKA-injected  
362 animals experienced vigorous convulsive SE meaning that there were several stage 5  
363 seizures. After the first stage 5 seizure, the cage was removed from the heating pad to  
364 prevent hyperthermia. The body temperature was regularly (approximately every 15  
365 min) monitored with an infrared thermometer (Model #800048, Sper Scientific) to ensure  
366 that body temperature was within the physiological range (36-37°C).

367 Mice were visually monitored until normal behavior (defined as exploration and/or  
368 grooming) resumed. After 3-4 hrs of observation following IHKA injection, mice resumed  
369 normal behavior, and they were returned to their home cages with normal bedding and  
370 no paper towel. The cages were kept overnight in the same location. After 1 day, mice  
371 were moved close to the EEG equipment so that they would acclimate to that area.

372 Starting with the day after IHKA injection, animals were handled for approximately 5  
373 min daily as described above and their body weight was measured for the next 7 days  
374 once daily. In 3 IHKA-injected mice (1 male, 2 female), body weight declined transiently  
375 by 10-18% so they were administered 3 ml of warm (36-37°C) sterile saline solution s.c.  
376 which did not affect chronic outcome measures as described in **Table 2**. The solution  
377 was administered once and within 24 hrs post-IHKA. These and other aspects of the  
378 IHKA injection procedure and subsequent 7 days are listed in **Table 2**.

379

### 380 **IV. EEG Recording**

#### 381 **A. Surgical implantation of EEG electrodes**

382 Two wks after IHKA injection, animals were implanted with 6 subdural electrodes (4  
383 recording, 1 reference, 1 ground; see below for details). As mentioned above, this time  
384 was chosen because animals were already exhibiting convulsive seizures in their  
385 homecage, so the period of epileptogenesis appeared to be over.

386 Mice were anesthetized with 3% isoflurane (Aerrane, Henry Schein) for 2 min and  
387 then transferred to the stereotaxic apparatus (Model #502063, World Precision  
388 Instruments). Anesthesia was then lowered to 1-2% and monitored the same way as  
389 described above for IHKA injection. Note that vendor information is already specified  
390 above for many of the items used below and where not the vendor information is  
391 provided. Mice were placed on top of a homeothermic blanket, eye ointment was  
392 applied, and the scalp was shaved and cleaned following the same procedures  
393 described above. A midline incision was made with a sterile scalpel and the skull was  
394 cleaned with sterile saline. Two burr holes were drilled over the left and right  
395 hippocampus (-2.5 mm A-P,  $\pm$  1.75 mm M-L), slightly posterior to the septotemporal  
396 level where KA was injected. Two additional burr holes were drilled anterior to the IHKA  
397 injection site (-0.5 mm A-P,  $\pm$  1.5 mm M-L) to serve as the cortical recording leads.  
398 Subdural screw electrodes (0.10" length stainless steel) were placed in the burr holes  
399 and secured using dental cement (Jet Set-4 Denture Repair, Lang Dental). Two  
400 additional burr holes were drilled above the cerebellar region to serve as reference (-5.7  
401 mm A-P, +1.25 mm M-L) and ground (-5.7 mm A-P, -1.25 mm M-L). The reference was  
402 placed contralateral to the IHKA injection site and the ground was ipsilateral. The  
403 subdural screw electrodes were attached to an 8-pin connector (#ED83100-ND,  
404 Digikey) which was secured to the skull with dental cement.

405

#### 406 B. Continuous wide-band video-EEG monitoring

407 One-day after EEG surgery and until the vEEG recording started, mice were housed  
408 in the room where the vEEG equipment was located so that they could acclimate to the  
409 recording environment. For recording, mice were placed into a 21 cm x 19 cm square  
410 transparent plexiglass cage which had access to food and water and had no cage lid.  
411 Food was placed on the bottom of the cage and a water bottle was attached to one of  
412 the walls of the cage. A pre-amplifier (Pinnacle Technologies) was connected to the 8-  
413 pin connector and then to a commutator (Pinnacle Technologies) which allowed free  
414 movement of the mouse in the entire cage. EEG signals were amplified 10 times and  
415 recorded at 2 kHz sampling rate using a bandpass filter (0.5-500 Hz) and Sirenia  
416 Acquisition System (Pinnacle Technologies). High frame rate video (30 fs) was recorded  
417 simultaneously using an infrared LED camera (Model #AP-DCS100W, Apex CCTV).

418

#### 419 C. Quantification of video-EEG

##### 420 1. Seizure analyses

421 Seizures were detected from vEEG by a blinded investigator (CPL) using replay of  
422 the EEG and video records. The left hippocampal lead was chosen for most  
423 measurements because it was the site of the IHKA injection. However, seizures were  
424 typically present in all leads. Therefore, they demonstrated robust synchronization and  
425 generalization.

426 The electrographic component of a seizure, whether convulsive or non-convulsive,  
427 was defined by a sudden change in amplitude  $>2x$  of the standard deviation (SD) of the  
428 baseline mean. The threshold,  $2x$  the SD of the baseline mean, was chosen because it  
429 was adequate to differentiate seizures from normal EEG. The baseline mean was  
430 calculated from the 30 sec prior to the event that was being considered to be a possible  
431 seizure. During this 30 sec baseline, care was taken to choose a time when the

432 behavioral state was not interrupted by large artifacts or abrupt behavioral state  
433 changes. An electrographic seizure was also defined by high frequency rhythmic activity  
434 (>5 Hz) which consisted of an abnormal pattern (large amplitude spikes and clusters of  
435 spikes lasting for at least 10 sec). Ten seconds was chosen because seizures in TLE  
436 typically last at least 10 sec and often are 20-60 sec (Balish et al., 1991). In addition,  
437 most seizures recorded in a standard Epilepsy Monitoring Unit typically last more than  
438 10 sec (Jenssen et al., 2006). We also have found that the majority of seizures in  
439 epileptic mice after pilocarpine-induced SE in our laboratory were at least 10 sec and  
440 usually 20-60 sec (Iyengar et al., 2015; Botterill et al., 2019; Jain et al., 2019). **Seizure**  
441 **onset** was defined as the time when the baseline of the left hippocampal lead exceeded  
442 2x the SD of the baseline mean. The **end of a seizure** (seizure termination) was  
443 defined as the time when high amplitude activity declined to <2x the SD of the baseline  
444 mean. **Seizure duration** was calculated by subtracting the time of seizure termination  
445 (the end of the seizure as defined above) from the time of seizure onset. **Seizure**  
446 **burden** was quantified as the number of days that animals sustained chronic seizures  
447 (either non-convulsive or convulsive) divided by the total number of days that  
448 continuous vEEG was performed at 2-4 and 10-12 wks (i.e., 14 days). For each seizure,  
449 the light cycle was noted as lights on (7:00 a.m.) or off (7:00 p.m.) and the time of the  
450 day with a.m. and p.m. The behavioral state when the seizure began was determined as  
451 either wakefulness or sleep based on video and the EEG for a period of 30 sec before  
452 seizure onset. The **awake** state included awake exploration and awake immobility.  
453 **Awake exploration** was defined by walking or other movement around the cage and  
454 the predominance of theta rhythm (4-12 Hz in the hippocampal leads) with eyes open  
455 (when the mouse was facing the camera). **Awake immobility** was not accompanied by  
456 exploration, but eyes were open. **Sleep** was defined either as non-rapid eye movement  
457 (NREM) or rapid eye movement (REM) sleep. **NREM** was dominated by slow wave  
458 activity in the delta (<5 Hz) frequency range and eyes were closed with no movement of  
459 the body. **REM** sleep was defined by theta rhythm (4-12 Hz) and eyes closed with no  
460 movement of the body. For defining sleep stages, we relied on leads contralateral to the  
461 IHKA injection site because of previous reports about loss of theta rhythm  
462 predominantly adjacent to the IHKA injection site (Riban et al., 2002; Arabadzisz et al.,  
463 2005).

464 For quantification, the percent of seizures in each category (on or off, a.m. or p.m.;  
465 awake or asleep) was calculated by dividing the number of seizures in a category by the  
466 total number of seizures. The total was either the total number per animal or the total  
467 number of all seizures in all animals.

468 Seizure onset patterns were defined LVF, HYP (as described above) or 'unclear'  
469 which was a seizure that had an onset pattern that was not possible to classify as LVF  
470 or HYP. LVF seizures started with a sentinel spike (amplitude >2x SD above the  
471 baseline mean) followed by brief suppression of the background EEG whereas HYP  
472 seizures began with high amplitude (>2x SD above the baseline mean) spiking at a  
473 frequency that was much greater than interictal spikes. These definitions are similar to  
474 those described in other animal models of epilepsy (Bragin et al., 2005; Behr et al.,  
475 2017) and human patients (Velasco et al., 2000).

476

## 477 2. High frequency oscillations (HFOs)

478 **HFOs** were defined as oscillations >250 Hz consistent with past studies in humans  
479 (Staba et al., 2004) and animals (Bragin et al., 1999a). To sample HFOs, NREM sleep  
480 was selected because prior studies suggested that HFOs occur mainly during slow  
481 waves and sharp waves occurring in NREM sleep (Staba et al., 2004; Bagshaw et al.,  
482 2009). For each animal, an interictal period was chosen, and 10 min was sampled at  
483 least 1 hr after the last seizure and at least 1 hr before the next seizure. All 4 channels  
484 of wideband interictal EEG were visually inspected for the presence of HFOs and a 10  
485 min NREM sleep epoch was selected. This was possible because high frequency  
486 activity was visually discernable from the ongoing background EEG activity. We then  
487 applied an automated approach to detect HFOs using the RippleLab application written  
488 in MATLAB (Navarrete et al., 2016) and the algorithm developed by Staba and  
489 colleagues (Staba et al., 2002). Automated detection was followed by visual inspection  
490 of putative HFOs and inclusion/exclusion criteria were used to either include or exclude  
491 the putative events as HFOs. These criteria are described below. In brief, each channel  
492 was band-pass filtered between 250-500 Hz using a finite impulse response (FIR) digital  
493 filter and the root mean square (RMS) amplitude of the filtered signal was quantified.  
494 Successive RMS amplitudes >5x SDs above the mean amplitude of the RMS signal  
495 calculated for the entire 10 min epoch (during NREM) that lasted >6 msec in duration  
496 were defined as putative HFOs. Putative HFOs that did not have at least 4 peaks in the  
497 rectified band-passed signal >3x SDs greater than the mean of the baseline signal were  
498 excluded. We then reviewed each putative HFO to exclude artifactual events associated  
499 with movement or other sources of noise (Bénar et al., 2010; Menendez de la Prida et  
500 al., 2015; Amiri et al., 2016). To better appreciate HFO power in time, we applied time-  
501 frequency analyses to visualize HFO power. To that end, we used the time-frequency  
502 function which is part of RippleLab (Navarrete et al., 2016) and applied a 64-point  
503 window to analyze HFO power in the 250-500 Hz frequency domain.

504 Whether HFOs were interictal or ictal was visually determined by inspecting all 4  
505 channels. **Interictal HFOs** were determined from the EEG at least 1 hr before or 1 hr  
506 after a seizure. **Ictal HFOs** were visually defined as HFOs that occurred at seizure  
507 onset and during seizures by inspecting all 4 channels for the presence of HFOs >250  
508 Hz.

## 509 **V. Anatomy**

### 511 A. Perfusion-fixation and sectioning

512 Mice were deeply anesthetized with isoflurane and they were injected with an  
513 overdose of urethane (2.5 g/kg, i.p.; Sigma Aldrich). During surgical anesthesia, defined  
514 as the time when mice did not respond to a toe pinch with a withdrawal reflex, the  
515 abdominal cavity was opened with a scalpel and a 25 gauge butterfly-style needle  
516 (Model #J454D, Jorvet) was inserted into the heart. When the needle was clamped in  
517 place with a hemostat, mice were transcidentally perfused with 10 ml of room  
518 temperature (25°C) saline, followed by 30 ml of cold 4% paraformaldehyde (#1920,  
519 Electron Microscopy Systems) in 0.1 M phosphate buffer (PB; pH=7.4) using a  
520 peristaltic pump at a rate of 10-12 ml/min (Minipuls2, Gilson). The brain was quickly  
521 removed and stored overnight in 4% paraformaldehyde in 0.1 M PB. An incision was  
522 made laterally on the right side of the brain to mark the side that was contralateral to the

523 IHKA injection. On the next day, the brains were sectioned (50  $\mu$ m thickness) in the  
524 coronal plane using a vibratome (Vibratome 3000, Ted Pella) in Tris buffer. Sections  
525 were stored in 24 or 48 well tissue culture plates containing cryoprotectant solution  
526 (25% glycerol, 30% ethylene glycol, 45% 0.1 M PB, pH 6.7) at 4°C until use.

527

#### 528 B. Nissl staining

529 For Nissl staining, sections were mounted on 3% gelatin-coated slides and left to  
530 dry overnight at room temperature. Then slides were dehydrated in increasing  
531 concentrations of ethanol (70%, 95%, 100%, 100%) for 2.5 min each, cleared in Xylene  
532 (Sigma Aldrich) for 10 min, and then dehydrated again (70%, 95%, 100%, 100%)  
533 followed by hydration in double-distilled (dd) H<sub>2</sub>O for 30 sec. Then sections were stained  
534 with 0.25% cresyl violet (Sigma Aldrich) dissolved in ddH<sub>2</sub>O for 1.5 min followed by 30  
535 sec in 4% acetic acid solution dissolved in ddH<sub>2</sub>O. Then sections were dehydrated  
536 (70%, 95%, 100%, 100%), cleared in Xylene for 4 min, and cover-slipped with Permount  
537 (Electron Microscopy Systems).

538

#### 539 C. Quantification

540 To estimate neuronal loss and granule cell dispersion in dorsal hippocampus, one  
541 coronal section per animal was selected slightly anterior to both the IHKA or saline  
542 injection site. This site also allowed us to assess tissue integrity near the injection track  
543 and subdural electrode near the injection site. This dorsal section corresponded to  
544 approximately -1.94 to -2.06 mm posterior to Bregma in a common mouse stereotaxic  
545 atlas (Figures 47-48; Franklin and Paxinos, 1997). We chose this coronal level to  
546 conduct our anatomical procedures based on previous reports suggesting that neuronal  
547 loss is maximal adjacent to the IHKA injection site (Bouilleret et al., 1999; Riban et al.,  
548 2002). In both IHKA- and saline-injected mice, good tissue integrity was observed near  
549 the injection site, and the injection track was actually hard to see. This absence of  
550 damage by the injection needle rendered anatomical assessments possible at this  
551 tissue level. The absence of a visible injection track was probably achieved because we  
552 used a syringe and not a permanently implanted (guide) cannula to inject KA or saline.  
553 The absence of damage from the EEG recording electrode was because we used  
554 subdural screw electrodes instead of depth electrodes for our vEEG monitoring. All  
555 these approaches significantly minimized tissue damage near the injection site,  
556 providing an opportunity to assess the injection area with limited technical confounds.

557 Nissl-stained sections were imaged using a microscope (Model BX51, Olympus of  
558 America) and digital camera (Infinity3-6URC) at 2752x2192 pixel resolution.  
559 Photographs were taken with Infinity capture software (version 6.5.6). After images  
560 were imported to ImageJ software (NIH), we measured the pyramidal cell layer length  
561 (PCL length), granule cell layer (GCL) area, and GCL width or thickness. Details are  
562 shown in **Supplemental Figure 1**. For PCL length, a line was drawn using the freehand  
563 line tool from the border of the PCL in CA3c with the DG hilus to the CA1 border with  
564 the subiculum. The CA3c cell layer at the border with the hilus was defined as the point  
565 where pyramidal cells became sufficiently close so that there was <1 pyramidal cell  
566 body width apart from adjacent PCs. The CA1 cell layer at the border with the  
567 subiculum was defined in an analogous manner because the cell layer broadens  
568 significantly as the subiculum begins. For GCL area measurements, we traced the

569 borders of the GCL using the freehand tool. The GCL was distinguished from the hilus  
570 as the point where GC somata had <1 cell width distance between them. For GCL  
571 thickness, we used the straight-line tool to measure the thickest part of the layer. The  
572 line to measure thickness was made perpendicular to the GCL, starting at the border  
573 with the hilus and ending at the border with the inner molecular layer (IML). Two  
574 measurements were made of the widest part of the upper and the lower blade, and then  
575 we averaged the 2 measurements.

576

## 577 **VI. Statistics**

578 Data are presented as mean  $\pm$  standard error of the mean (SEM). Statistical  
579 significance was set at  $p < 0.05$  and is denoted by asterisks on all graphs. All statistical  
580 analyses were performed using Prism (version 8.4.2, Graphpad). Comparisons of  
581 parametric data of two groups were done using unpaired or paired two-tailed Student's  
582 t-test. To determine if data fit a normal distribution the D'Agostino-Pearson test was  
583 used in Graphpad. To determine if the variance of groups was homogeneous, the  
584 Brown-Forsythe test was used in Graphpad. When data did not fit a normal distribution  
585 or transformation was unable to resolve differences in variance, nonparametric statistics  
586 were used. The non-parametric tests were the Mann-Whitney U-test to compare two  
587 groups and the Kruskal-Wallis ANOVA for multiple groups. For correlation analyses we  
588 used linear regression and the Pearson correlation coefficient ( $r$ ) in Graphpad.

589

## 590 **VII. Experimental design and data collection**

591 The present study used *Amigo2-Cre<sup>+/+</sup>* or *Amigo2-Cre<sup>-/-</sup>* mice for IHKA and saline  
592 injections. Animals were first acclimated and then KA or saline was injected in the  
593 hippocampus. A cohort of 5 IHKA-injected animals was recorded at 2-4 wks post-IHKA  
594 and the same mice were recorded again at 10-12 wks with continuous wideband vEEG  
595 monitoring. In addition, 3 IHKA-injected animals were recorded only at 10-12 wks.

596 For anatomy, animals were perfusion-fixed after vEEG, 12 wks post-IHKA ( $n=8$ ).  
597 Earlier times were also checked to confirm a similar degree of PCL damage (3 days,  
598  $n=1$ ; 3 wks,  $n=1$ ), consistent with the idea that most pyramidal cell loss occurs shortly  
599 after SE (Sutula and Pitkänen, 2002). Saline-treated mice were examined also (3 days,  
600  $n=1$ ; 2-4 wks,  $n=3$ ) and did not show neuronal loss, as described in more detail in the  
601 Results. A list of all animals included in the study is presented in **Table 1**. Only one  
602 animal died in this study, and that was unrelated to the study.

603

## 604 **VIII. Data collection**

605 Although, EEG analyses and quantification of Nissl-stained sections were done by  
606 an investigator (CPL) who was blinded to the experimental group and sex, data  
607 collection was unblinded because animals were more active after IHKA injection  
608 compared to saline-injected controls.

609 Data collection was done using Case Report Forms (CRFs), where each CRF was  
610 specific for a procedure such as IHKA injection. Common Data Elements (CDEs) were  
611 compiled as previously described (Harte-Hargrove et al., 2018; Scharfman et al., 2018).  
612 We provide all CDEs we used in each procedure-specific CRF as a supplemental .xls  
613 file.

614

615 **RESULTS**

616

617 **I. IHKA leads to epilepsy with frequent spontaneous convulsive seizures**

618 To determine whether convulsive seizures occurred in the mice that were injected  
619 with KA (IHKA-treated mice), mice were monitored by continuous vEEG from 2-4 and  
620 10-12 wks after IHKA-induced convulsive SE (**Figure 1A**). At both the early (2-4 wks)  
621 and late (10-12 wks) times, convulsive seizures occurred spontaneously and were  
622 typically frequent (multiple seizures per day) and severe (stage 4-5). A representative  
623 example of a convulsive seizure is shown in **Figure 1B1** and is expanded in **Figure**  
624 **1B2**.

625

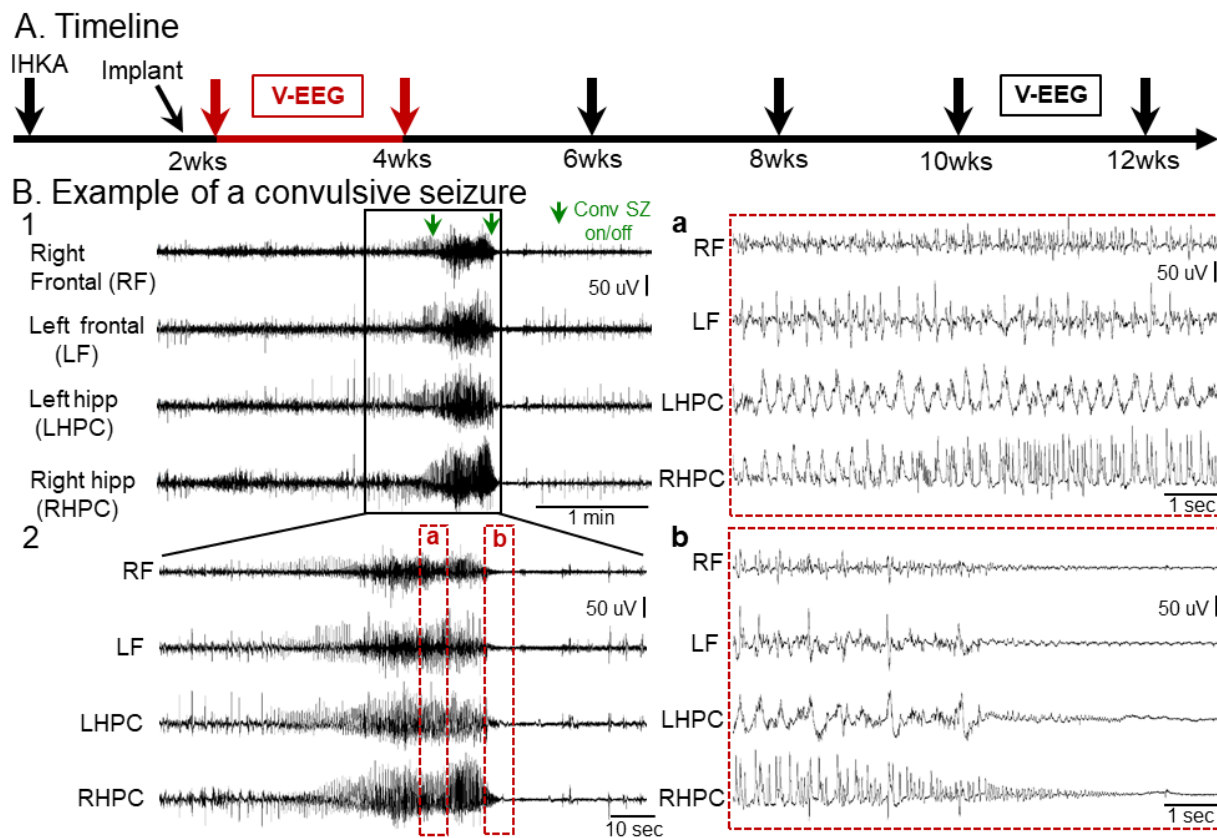

626

627

628 **Figure 1. Example of a spontaneous convulsive seizure recorded 2-4 wks after IHKA**

629 **(A)** Experimental timeline of the study. Animals were injected with KA in the left dorsal hippocampus and  
630 10 days later they were implanted with 4 subdural screw electrodes. They were then vEEG monitored  
631 2-4 wks post-IHKA continuously (red arrows, with data from this time shown in B) and then recorded  
632 again at 10-12 wks post-IHKA.

633 **(B)** Representative example of a chronic convulsive seizure recorded during the 2-4 wk session after IHKA.  
634 Four leads were used to record right and left frontal cortices and left and right hippocampal regions. A  
635 5 min-long EEG trace with seizure activity in all 4 leads is shown in B1. The start and the end of the  
636 convulsive seizure is indicated by green arrows (Conv SZ on/off). The same seizure is shown in a 2  
637 min-long time window in B2 and further expanded (a, b) in 10 sec epochs to better show the EEG  
638 complexity. Inset a of the seizure in B2 shows complex and often rhythmic activity with fast and slow  
639 components. Inset b of the seizure in B2 shows prolonged suppression of the background EEG in all 4  
640 leads after the termination of the electrographic manifestations of the seizure.

641

642 The EEG corresponding to the seizures reflected robust seizure activity in that  
643 there was abnormal high frequency activity lasting 20-60 sec (**Figure 1**).  
644 Specifically, there was a sudden increase in amplitude ( $>2x$  SD above the mean) of  
645 rhythmic ( $>5$  Hz) activity that was followed by a suppression of the EEG (**Figure**  
646 **1B1, 1B2**) lasting  $21.5 \pm 2.3$  sec. For this measurement, the mean was first  
647 calculated for 4 seizures at random for one animal. Then the mean was taken for 5  
648 animals. Insets a (**Figure 1B2a**) and b (**Figure 1B2b**) show EEG traces where the  
649 complex rhythmic activity that is typical of a seizure is clear. The first inset shows  
650 the EEG during the seizure and the second inset shows the postictal suppression.  
651 Although there was some variability between leads, the EEG correlates of a severe  
652 seizure and postictal suppression were evident at each recording location. During  
653 the part of the EEG that appeared to be a seizure, convulsions typically developed  
654 in the middle or later parts of the EEG seizure activity. Thus, the EEG showed  
655 evidence of a robust seizure first, and then a convulsion developed before the EEG  
656 manifestations of the seizure ended. At the same time as loss of postural tone, or  
657 after the convulsive behavior ended, the EEG manifestations of the seizure ended.

658 Next, we quantified chronic spontaneous convulsive seizures during the 2-4wks  
659 post-IHKA (**Figure 2A**) and results are shown in **Figure 2B-H**. The total number of  
660 convulsive seizures during the 2 wks is shown in **Figure 2B**, highlighting that every  
661 animal sustained multiple convulsive seizures. A breakdown of the number of  
662 seizures per day showed some variability between animals, although all animals  
663 had multiple convulsive seizures per day for many days in a row (**Figure 2C**). Note  
664 that one of the females (76-1) had fewer seizures than other mice (**Figure 2B-D**),  
665 but that mouse did have 5 convulsive seizures in 2 wks which is still a clear  
666 demonstration of chronic epilepsy.

667 The mean convulsive seizure frequency was  $2.1 \pm 0.5$  seizures per day (range  
668 0.3-3.7,  $n=5$  mice; **Figure 2D**). Convulsive seizures lasted for  $37.9 \pm 2.3$  sec (range  
669 29.9-43.0) when mean duration was calculated per animal, and when all seizures  
670 were pooled, the mean seizure duration was  $36.2 \pm 0.8$  sec (range 19.7-94.5; **Figure**  
671 **2E**).

672 Analyses of simultaneous video records revealed that convulsive seizures fit the  
673 modified Racine scale with a mean severity score of  $4.3 \pm 0.4$  (range 3-6) when the  
674 mean was calculated per animal, and  $4.1 \pm 1.1$  (range 3-7) when all seizures were  
675 pooled (**Figure 2F**). Next, we quantified the number of days that animals sustained  
676 convulsive seizures in 2-4 wks because this metric gives us an estimate of seizure  
677 burden (**Figure 2G**). The mean percent of days spent with seizures ( $57.0 \pm 10.5\%$ ,  
678 range 27-87%) was not different from the days spent without seizures ( $43.0 \pm 10.5\%$ ,  
679 range 13-73%; Wilcoxon signed rank test,  $p=0.62$ ). In order to account for any  
680 potential circadian effects on seizures, we calculated the percent of seizures  
681 occurring during the 12 hr-long period when lights were on and the 12 hr-long  
682 period when lights were off (**Figure 2H1a, 2H1b**), and no significant differences  
683 were found (paired t-test,  $t_{crit} = 1.472$ ,  $p=0.21$ ). We also did not find any differences  
684 when we examined the a.m. or p.m. (12:00 a.m.-12:00 p.m. vs. 12:00 p.m. to 12:00  
685 a.m.; paired t-test,  $t_{crit} = 0.015$ ,  $p=0.98$ ; **Figure 2H2a, 2H2b**). Finally, we examined  
686 the times when mice were awake and times they were asleep (awake and sleep are  
687 defined in the Methods) and no difference was found (paired t-test,  $t_{crit} = 2$ ,  $p=0.11$ ;



688 **Figure 2H3a, 2H3b).** Although no significant differences were detected for any of these  
 689 analyses, some individual animals showed a striking difference in seizures experienced  
 690 in the time period when lights were on or off, a.m. vs. p.m., or during awake vs. sleep  
 691 states (**Figure 2H**).  
 692

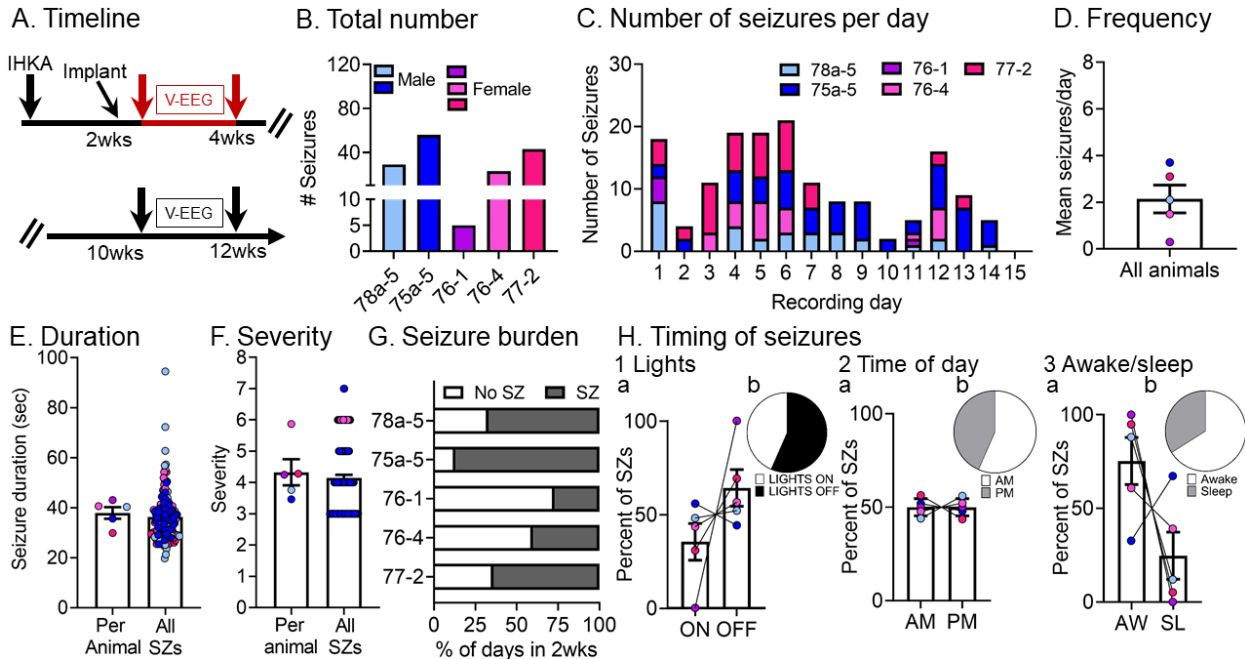

693  
 694  
 695 **Figure 2. Quantification of chronic spontaneous convulsive seizures 2-4 wks post-IHKA**  
 696 **(A)** Experimental timeline of the study. The 2-4 wk data were used in this figure (red arrows). For this  
 697 timepoint, there were 5 mice (males, blue; females, pink; total # seizures=415).  
 698 **(B)** The total number of chronic convulsive seizures recorded 2-4 wks post-IHKA is shown per animal. Note  
 699 that animals showed frequent convulsive seizures although there was variability. One of the female  
 700 mice, 76-1, had 5 seizures in 2 wks which is fewer than other animals, but nevertheless is a  
 701 demonstration of chronic epilepsy.  
 702 **(C)** The number of convulsive seizures per day and per animal is shown for all recording days. The animal  
 703 ID is shown in the inset.  
 704 **(D)** Convulsive seizure frequency was calculated as a mean number of convulsive seizures per day for  
 705 each animal.  
 706 **(E)** Convulsive seizure duration was calculated as the mean per animal (left) or the mean of all convulsive  
 707 seizure durations (right; n=143 seizures).  
 708 **(F)** Convulsive seizure severity was calculated as a mean per animal (left) or the mean of all convulsive  
 709 seizures (right; n=143 seizures).  
 710 **(G)** Convulsive seizure burden was defined as the percent of days spent with (SZ) or without (No SZ)  
 711 seizures.  
 712 **(H)** The percent of convulsive seizures is shown, either occurring during the light period or dark period of  
 713 the light:dark cycle (Lights ON or OFF; H1), a.m. or p.m. (AM, PM; H2), and in awake (AW) or sleep  
 714 (SL) state (H3). The percentages were calculated as the mean per animal (H1a, H2a, H3a) or the mean  
 715 of all seizures (H1b, H2b, H3b). There were no significant differences (Wilcoxon signed rank tests; all  
 716  $p > 0.05$ ).  
 717

718 In summary, convulsive seizures were robust both qualitatively and quantitatively in  
 719 IHKA-treated mice. Seizures were typically severe and observed with all recording  
 720 electrodes, indicating that they were generalized. They also showed additional

721 characteristics that have been discussed in human TLE, including HFOs, which are  
 722 discussed further below.

723

## 724 II. Chronic convulsive seizure frequency varies over time

725 Next, we continued to ask whether our IHKA model was robust. To that end, we  
 726 determined whether convulsive seizures persisted at 10-12 wks, 2.5-3.0 months after  
 727 IHKA.

728

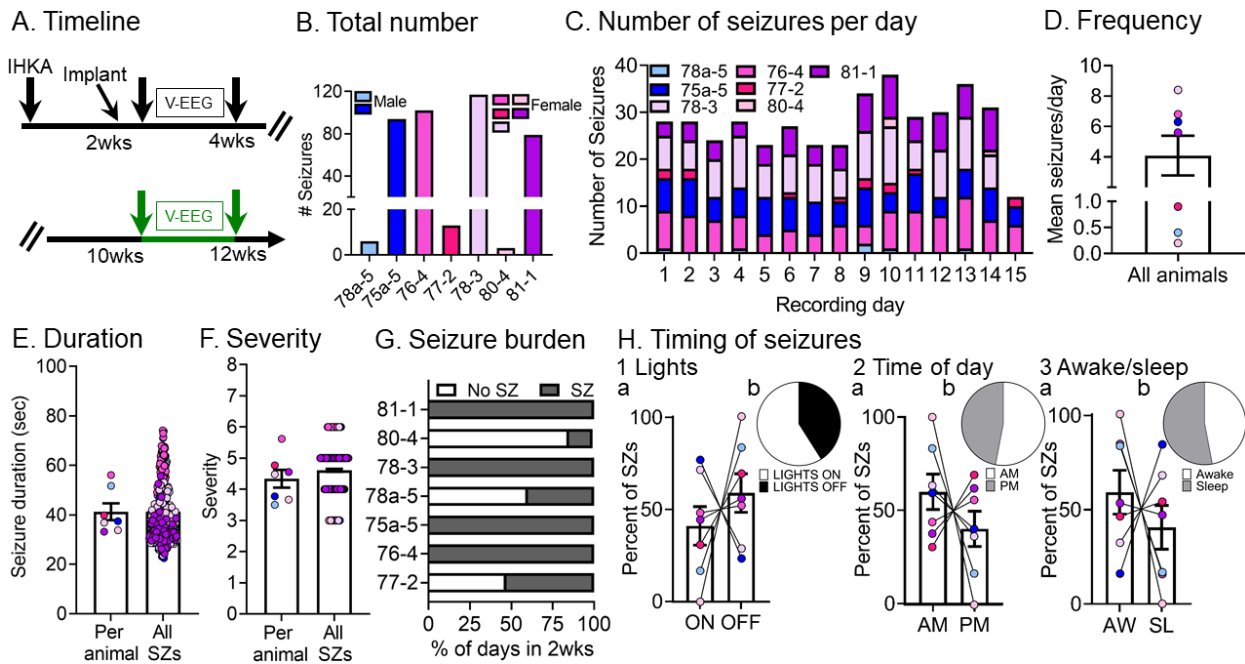

729

730

### 731 Figure 3. Quantification of chronic spontaneous convulsive seizures 10-12 wks post-IHKA

732 (A) Experimental timeline of the study. The 10-12 wk data were used for this figure (green arrows; total #  
 733 seizures=415). Animals were recorded 2-4 wks post-IHKA and then again at 10-12 wks post-IHKA (2  
 734 male, 2 female). Additionally, 3 animals were recorded at 10-12 wks only (3 females).

735 (B) The total number of chronic convulsive seizures is shown per animal. Note that all animals showed  
 736 convulsive seizures at 10 wks suggesting epilepsy persisted.

737 (C) The number of convulsive seizures per day and per animal is shown for all recording days. The animal  
 738 ID is shown in the inset.

739 (D) Convulsive seizure frequency was calculated as the mean number of convulsive seizures per day for  
 740 each animal.

741 (E) Convulsive seizure duration was calculated as the mean per animal (left) or the mean for all convulsive  
 742 seizures (right; n=415 seizures).

743 (F) Convulsive seizure severity was calculated as the mean per animal (left) or the mean of all convulsive  
 744 seizures (right; n=415 seizures).

745 (G) Convulsive seizure burden was defined as the percent of days spent with (SZ) or without (No SZ)  
 746 convulsive seizures.

747 (H) The percent of convulsive seizures is shown. either occurring during the light period or dark period of  
 748 the light:dark cycle (Lights ON or OFF; H1), a.m. or p.m. (AM/PM; H2), and awake (AW) or sleep (SL)  
 749 state (H3). The percentages were calculated as the mean per animal (H1a, H2a, H3a) or the mean of  
 750 all seizures (H1b, H2b, H3b). There were no significant differences (Wilcoxon signed rank tests; all  
 751 p>0.05).

752

753 Four out of 5 animals recorded at 2-4 wks were recorded again at 10-12 wks  
754 (**Figure 3A**) along with 3 other IHKA-injected animals (78-3, 80-4, 81-1) that were  
755 recorded at 10-12 wks only. A total of 415 seizures were analyzed and results are  
756 presented in **Figure 3B-H**. When all seizures during the two 2 wk-long periods (2-4 wks  
757 vs. 10-12 wks) were compared, 2 out of 4 animals that were recorded at both timepoints  
758 showed more seizures at 10-12 wks, an increase or progression (defined here as  
759 seizures that worsen with time), and the remaining 2 showed a decrease (see **Figure**  
760 **3B vs. Figure 2B**). We use the term progression conservatively as we cannot exclude  
761 the possibility that if a third timepoint was used the seizures that had increased from 2-4  
762 to 10-12 wks might decrease eventually or vice-versa.

763 Similar to the 2-4 wk timepoint, convulsive seizures at the 10-12 wk timepoint were  
764 evident for most recording days (**Figure 3C**). There was a mean frequency of  $4.0 \pm 1.3$   
765 (range 0.2-8.4) seizures per day per animal (**Figure 3D**). Convulsive seizures lasted for  
766  $41.2 \pm 3.4$  sec (range 33.2-56.0) when the mean duration was calculated per animal and  
767  $41.3 \pm 0.5$  sec (range 22.5-74.1) when all seizures were pooled (**Figure 3E**). These  
768 durations were not significantly different from those at 2-4 wks (**Supplemental Figure**  
769 **2D**, paired t-test,  $t_{crit} = 2.41$ ,  $p=0.09$ ). Regarding severity, most seizures were severe  
770 because seizures scores were  $4.4 \pm 0.3$  (range 3-6) when the mean was calculated per  
771 animal and  $4.6 \pm 0.04$  (range 3-6) when all seizures were pooled (**Figure 3F**). These  
772 seizures scores were not significantly different from those at 2-4 wks (Wilcoxon signed  
773 rank test,  $p=0.62$ ). The mean percent of days with seizures ( $72.4 \pm 13.7\%$ , range 14-  
774 100%) was not significantly different from the mean percent of days without seizures  
775 ( $27.4 \pm 13.6\%$ , range 0-85%; Wilcoxon signed rank test,  $p=0.10$ ), similar to the 2-4 wk  
776 timepoint.

777 For the “progressed” animals, seizure burden was 100% and for “non-progressed”  
778 mice it was  $46.5 \pm 6.5\%$  (**Figure 3G**). When comparing the percent of seizures occurring  
779 during the time that lights were on vs. the time when lights were off, there were no  
780 significant differences (Wilcoxon signed rank test,  $p=0.46$ ; **Figure 3H1a, 3H1b**). There  
781 also were no significant differences between the percent of seizures during the a.m. vs.  
782 p.m. (Wilcoxon signed rank test,  $p=0.46$ ; **Figure 3H2a, 3H2b**). Finally, there was no  
783 difference in the percent of seizures occurring in awake vs. sleep states (Wilcoxon  
784 signed rank test,  $p=0.57$ ; **Figure 3H3a, 3H3b**).

785 A comparison of the data from 2-4 and 10-12 wks showed no significant differences  
786 in the total number (paired t-test,  $t_{crit} = 0.61$ ,  $p=0.58$ ), frequency (paired t-test,  $t_{crit} = 0.55$ ,  
787  $p=0.61$ ), severity (paired t-test,  $t_{crit} = 0.37$ ,  $p=0.73$ ) or days spent with seizures (unpaired  
788 t-test,  $t_{crit} = 0.35$ ,  $p=0.73$ ). Also, no differences were found in the percent of seizures  
789 occurring during lights on vs. lights off, a.m. vs. p.m. or awake vs. sleep between the 2  
790 timepoints (**Supplemental Figure 3A**). The only difference was found in seizure  
791 duration as seizures at 2-4 wks were shorter than those recorded at 10-12 wks post-  
792 IHKA (paired t-test  $t_{crit} = 3.36$ ,  $p=0.043$ ). Therefore, taking seizure frequency into  
793 account, only 50% of mice “progressed”, but if seizure duration is used as a  
794 measurement of progression, the mice did exhibit worsening of their seizures with time.

795  
796  
797

### 805 804 803 802 801 800 799 798 **III. Chronic non-convulsive seizures occur after IHKA and are less frequent than convulsive seizures**

Next, we analyzed non-convulsive seizures to determine whether they also are frequent post-IHKA. To that end, the same animals presented before in **Figures 1** and **2** were analyzed as shown in **Figure 4A**. An example of a non-convulsive seizure is shown in **Figure 4B1** and an expanded version of the same seizure is shown in **Figure 4B2**.

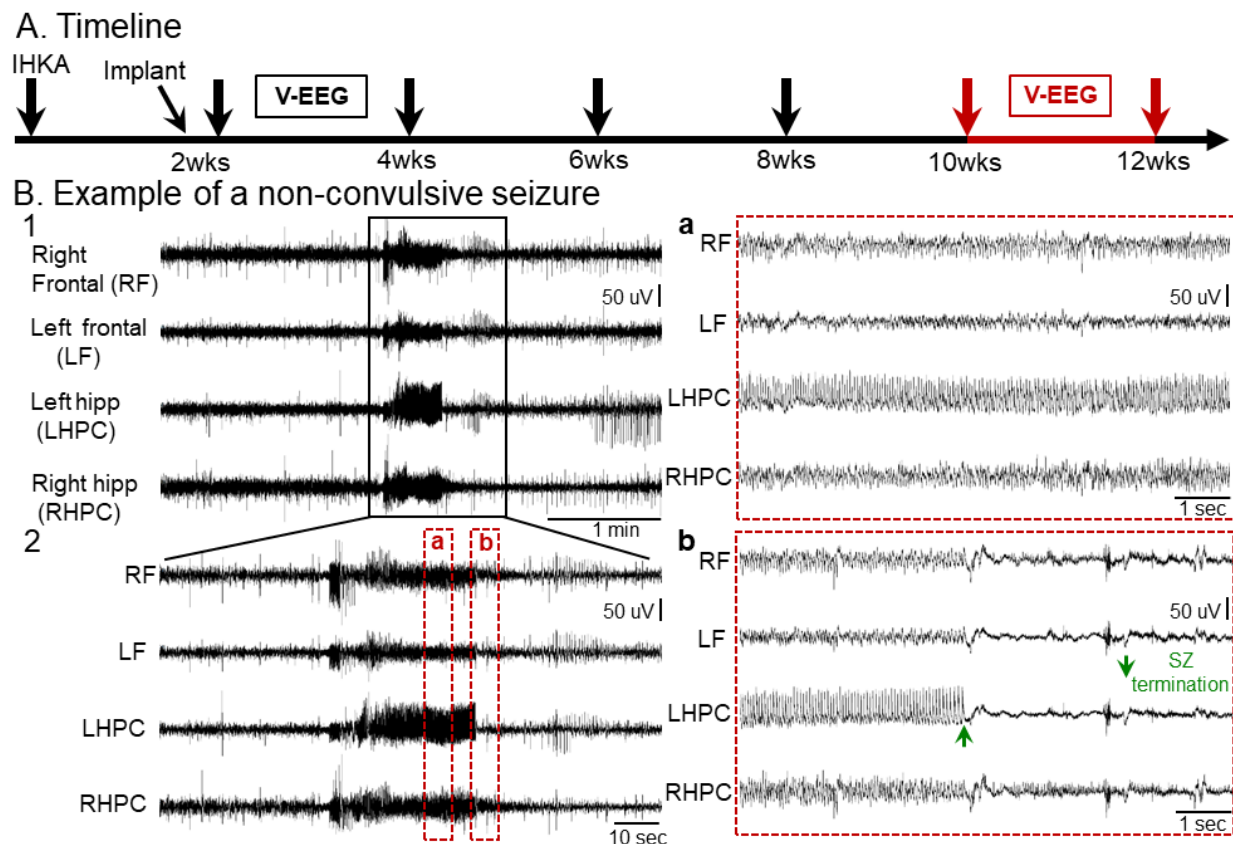

806 807 808 **Figure 4. A spontaneous non-convulsive seizure recorded 10-12 wks post-IHKA**

809 **(A)** Experimental timeline shows when the non-convulsive seizure in this figure was recorded, 10-12 wks post-IHKA (red arrows). For non-convulsive seizures, the mice were the same ones used to analyze convulsive seizures.

812 **(B)** Representative example of a non-convulsive seizure recorded 10-12 wks post-IHKA. A 5 min-long EEG trace illustrating seizure activity in all 4 leads is shown in B1. The same seizure is depicted in a 2 min-long time window in B2 and further expanded in 10 sec-long epochs to better highlight electrographic activity over time. Inset a shows electrographic activity during the non-convulsive seizure. Inset b shows seizure termination. Note seizure termination was more distinct for some leads and the lead that was most distinct (green arrow in b, LHPC) varied from seizure to seizure.

819 The electrographic correlate of non-convulsive seizures consisted of a sudden increase in amplitude of rhythmic activity (>5 Hz) in all 4 leads. Insets in **Figure 4** show expanded EEG traces where the electrographic correlate of a non-convulsive seizure can be further appreciated. The non-convulsive seizure was characterized by trains of spikes of variable amplitude which appeared to occur synchronously in

824 all 4 leads. Interestingly, post-ictal depression was not as pronounced as after a  
825 convulsive seizure (see **Figure 1B2b**).

826 We next quantified non-convulsive seizures at 2-4 wks (**Figure 5A**) and results are  
827 shown in **Figure 5B-H**. We found that both the total number and frequency of non-  
828 convulsive seizures were less frequent than convulsive seizures at 2-4 wks (paired t-  
829 test,  $t_{crit}=3.29$ ,  $p=0.03$ ; paired t-test,  $t_{crit}=3.32$ ,  $p=0.02$ , respectively) with no differences  
830 in mean duration (paired t-test,  $t_{crit}=1.21$ ,  $p=0.34$ ); **Supplemental Figure 2D**). More  
831

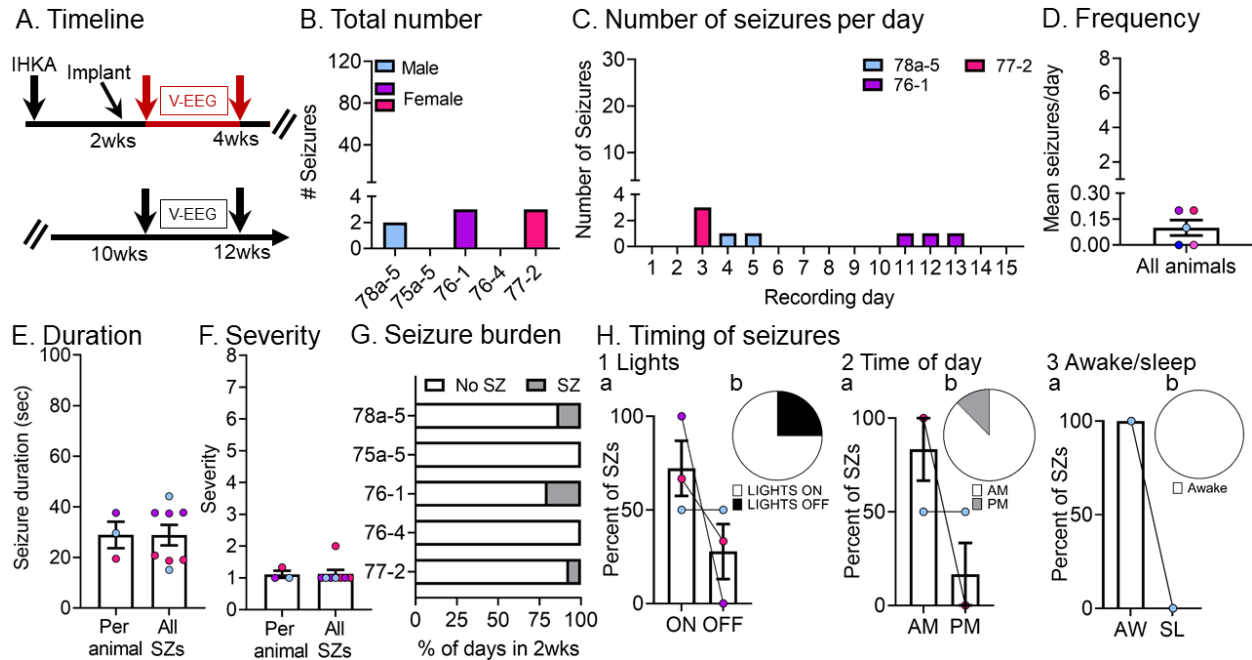

832  
833  
834 **Figure 5. Quantification of chronic spontaneous non-convulsive seizures 2-4 wks post-IHKA**  
835 **(A)** Experimental timeline of the study. The seizures for this figure were recorded 2-4 wks after IHKA (red  
836 arrows; total # seizures=8). The mice were the same as those used for convulsive seizure  
837 measurements.  
838 **(B)** The total number of chronic non-convulsive seizures during the 2 wk-long recording period is shown  
839 per animal. Blue and pink shades represent males and females, respectively.  
840 **(C)** The number of non-convulsive seizures per day and per animal is shown for all recording days. The  
841 animal ID is shown in the inset.  
842 **(D)** Non-convulsive seizure frequency was calculated as the mean number of non-convulsive seizures per  
843 day for each animal.  
844 **(E)** Non-convulsive seizure duration was calculated as the mean per animal (left) or the mean of all non-  
845 convulsive seizures (right;  $n=8$  seizures).  
846 **(F)** Non-convulsive seizure severity was calculated as the mean per animal (left) or the mean of all non-  
847 convulsive seizures (right;  $n=8$  seizures).  
848 **(G)** Non-convulsive seizure burden was defined as the percent of days spent with (SZ) or without (No SZ)  
849 non-convulsive seizures in the 2-4 wk-long recording period.  
850 **(H)** The percent of non-convulsive seizures is shown, either occurring during the light period or dark period  
851 of the light:dark cycle (Lights ON or OFF; H1), a.m. or p.m. (AM/PM; H2), and awake (AW) or sleep  
852 (SL) state. Percentages are shown for the mean per animal (H1a, H2a, H3a) or the mean of all seizures  
853 (H1b, H2b, H3b). Note that in H2a there are 3 animals but the lines for 2 of the animals overlap since  
854 all of their seizures occurred during AM. In H3a, all seizures in all 3 animals occurred during the awake  
855 state (lines are overlapping). Statistical comparisons: H1a, not significant (Wilcoxon signed rank test;  
856  $p>0.05$ ); H2a, not significant (Wilcoxon signed rank test;  $p>0.05$ ); H3a, not significant (Wilcoxon signed  
857 rank test;  $p>0.05$ ).

858 detailed comparisons about lights on vs. off, a.m. vs. p.m. and awake vs. sleep are  
859 shown in **Supplemental Figure 3C and 3D**.

860 **Figure 5C** shows the numbers of non-convulsive seizures for the different  
861 recording days, and it is evident that there could be few non-convulsive seizures.  
862 The mean frequency of non-convulsive seizures was  $0.1 \pm 0.04$  seizures per day  
863 (range 0-0.2;  $n=5$  mice; **Figure 5D**) and the duration was  $28.8 \pm 5.2$  sec (range 19.4-  
864 37.5 sec) when the mean was calculated per animal and  $28.7 \pm 4.0$  sec (range 15.0-  
865 44.1 sec) when all seizures were pooled together (**Figure 5E**). The mean severity  
866 score was  $1.1 \pm 0.1$  (range 1-2) per animal and  $1.1 \pm 0.1$  (range 1-2) when all seizures  
867 were pooled (**Figure 5F**). The mean percent of days spent with vs. without seizures  
868 was  $8.0 \pm 3.8\%$  (range 0-20%) and  $92.0 \pm 3.8\%$  (range 80-100%) respectively (**Figure**  
869 **5G**) which was statistically significant (paired t-test,  $t_{crit}=10.88$ ,  $p<0.001$ ). No  
870 significant differences were found for lights on vs. off (Wilcoxon signed rank test,  
871  $p=0.50$ ; **Figure 5H1a, 5H1b**), but all seizures occurred in the awake state (**Figure**  
872 **5H3a, 5H3b**).

873 To determine whether non-convulsive seizures persisted with time, 4 out of 5  
874 animals recorded at 2-4 wks were recorded again at 10-12 wks, as well as 3 more  
875 animals (78-3, 80-4, 81-1) that were recorded at 10-12 wks only (**Figure 6A**).  
876 Quantified non-convulsive seizures at 10-12 wks post-IHKA are shown in **Figure 6B-**  
877 **H**. Non-convulsive seizures at 2-4 wks and 10-12 wks were similar in number (paired  
878 t-test,  $t_{crit} = 1.88$ ,  $p=0.15$ ; **Figure 6B, Supplemental Figure 2B**) and frequency  
879 (paired t-test,  $t_{crit} = 1.89$ ,  $p=0.15$ ; **Figure 6C, Supplemental Figure 2C**). Seizure  
880 duration and severity are summarized in **Figures 6E and F** respectively and there  
881 was no significant difference from 2-4 wks (**Supplemental Figure 2D**). The percent  
882 of days spent with vs. without seizures did not change between timepoints (Wilcoxon  
883 signed rank test,  $p=0.25$ ; **Figure 6G vs. Figure 5G**). There were also no significant  
884 differences in the proportion of seizures occurring during lights on vs. off (Wilcoxon  
885 signed rank test,  $p>0.99$ ), a.m. vs. p.m. (Wilcoxon signed rank test,  $p=0.18$ ) and  
886 awake vs. sleep states (Wilcoxon signed rank test,  $p=0.50$ ; **Figure 6H**), which did  
887 not differ with the 2-4 wk timepoint (**Supplemental Figure 3B**).

#### 888 889 **IV. Different seizure onset patterns can be recorded and their prevalence changes** 890 **with time**

891 Recently several laboratories have suggested that seizures in rodent models of TLE  
892 can simulate human seizures (Velasco et al., 2000), and discussed several types of  
893 seizures based on their onset (Bragin et al., 1999b; Avoli et al., 2016). A common  
894 nomenclature refers to two types primarily: one type with low-voltage fast activity at the  
895 seizure onset (LVF seizure; Bragin et al., 1999b) and another type with a  
896 hypersynchronous onset (HYP; Bragin et al., 1999b).  
897

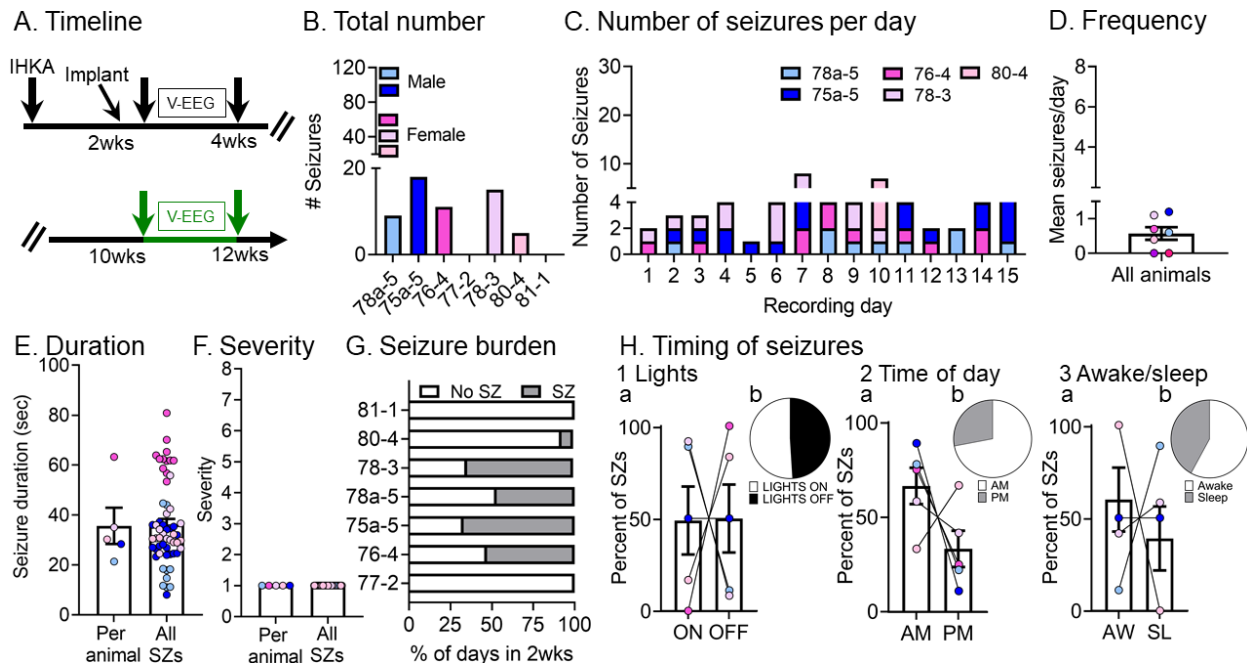

898  
899

**Figure 6. Quantification of chronic spontaneous non-convulsive seizures 10-12 wks post-IHKA**

- (A) Experimental timeline of the study. The seizures for this figure were recorded 10-12 wks after IHKA (green arrows; total # seizures=58). The mice were the same as those used for convulsive seizure measurements.
- (B) The total number of chronic non-convulsive seizures during the 2 wk-long recording period is shown per animal. Blue and pink shades represent males and females, respectively.
- (C) The number of non-convulsive seizures per day and per animal is shown for all recording days. The animal ID is shown in the inset.
- (D) Non-convulsive seizure frequency was calculated as the mean number of non-convulsive seizures per day for each animal.
- (E) Non-convulsive seizure duration was calculated as the mean per animal (left) or the mean of all non-convulsive seizures (right; n=58 seizures).
- (F) Non-convulsive seizure severity was calculated as the mean per animal (left) or the mean of all non-convulsive seizures (right; n=58 seizures).
- (G) Non-convulsive seizure burden was defined as the percent of days spent with (SZ) or without (No SZ) non-convulsive seizures in the 2 wks of continuous vEEG starting at 10 wks.
- (H) The percent of non-convulsive seizures is shown, either occurring during the light period or dark period of the light:dark cycle (Lights ON or OFF; H1), a.m. or p.m. (AM/PM; H2), and awake (AW) or sleep (SL) state (H3). The percentages were calculated as the mean per animal (H1a, H2a, H3a) or the mean of all seizures (H1b, H2b, H3b) respectively. They were no significant differences (Wilcoxon signed rank tests; all  $p > 0.05$ ).

921

922 The seizures we recorded showed onset patterns that remarkably, almost always fit  
 923 the description of LVF and HYP seizures. The LVF pattern was characterized by a  
 924 “sentinel” spike and by brief suppression of background EEG followed by rhythmic  
 925 activity (**Figure 7A**). The HYP pattern was characterized by a progressive increase in  
 926 spike frequency (2-5 Hz) that eventually escalated to the point where a seizure was  
 927 clear (**Figure 7B**). However, there were some seizures that could not fit into the two  
 928 categories, which we classified as “unclear” onset.

929

930

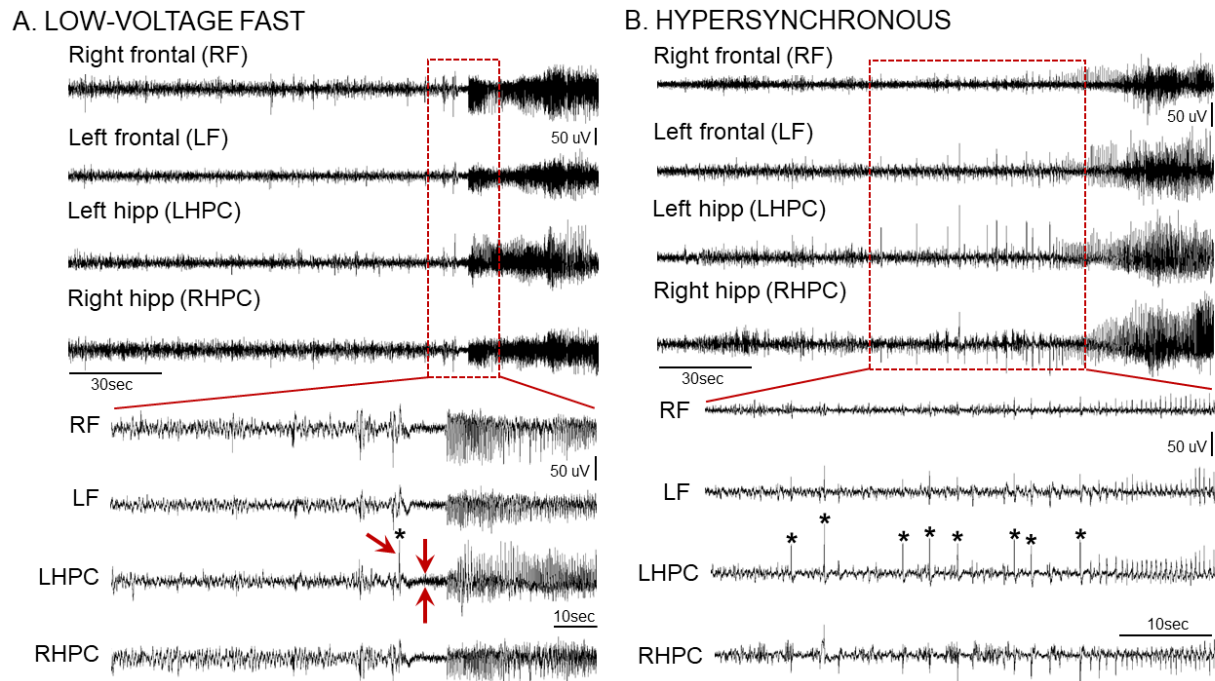

931  
932

933 **Figure 7. Chronic IHKA seizures show different seizure onset patterns**

934 **(A)** Representative example of a low-voltage fast (LVF) onset seizure recorded during the 10-12 wk  
935 recording session post-IHKA. A 30 sec-long EEG trace (Top) and an expanded 10 sec-long epoch  
936 (Bottom) taken from the seizure onset are shown. Note that the LVF pattern starts with a sentinel spike  
937 (asterisk and single red arrow in the expanded trace at the Bottom) followed by brief suppression of the  
938 background EEG (2 red arrows pointing at each side of the EEG suppression) and subsequent series  
939 of spikes.

940 **(B)** Representative example of a hypersynchronous (HYP) onset seizure recorded during the 2-4 wk  
941 recording period post-IHKA. A 2 min-long EEG trace (Top) and an expanded 30 sec-long epoch  
942 (Bottom) taken from the seizure onset are shown. Note that the HYP patterns start with a series of  
943 spikes (asterisks) followed by spikes at increased frequency.

944

945 Next, we quantified the different seizure onset patterns to understand if one of  
946 the two patterns was more prominent (**Figure 8**). For this analysis, we analyzed a  
947 total of 632 seizures (all data from each timepoint were pooled). Remarkably, almost  
948 all seizures either fit the LVF or HYP pattern (**Figure 8B**). There were no significant  
949 differences between LVF and HYP seizures in the total number (paired t-test,  
950  $t_{crit}=2.02$ ,  $p=0.08$ ; **Figure 8B**) or frequency (paired t-test,  $t_{crit}=2.03$ ,  $p=0.08$ ; **Figure**  
951 **8C**). When seizure durations were measured for each animal, the means were not  
952 different (Wilcoxon signed rank test,  $p=0.84$ ; **Figure 8D1**). There also was no  
953 difference when all seizure durations were pooled (Wilcoxon signed rank test,  
954  $p=0.20$ ; **Figure 8D2**). The severity was not different when it was measured for each  
955 animal (Wilcoxon signed rank test,  $p=0.31$ ; **Figure 8E1**), but HYP seizures were  
956 significantly more severe when all seizures were pooled (Wilcoxon signed rank test,  
957  $p<0.0001$ ; **Figure 8E2**), probably because the sample size for severity was animals  
958 and the sample size for all seizures was much larger



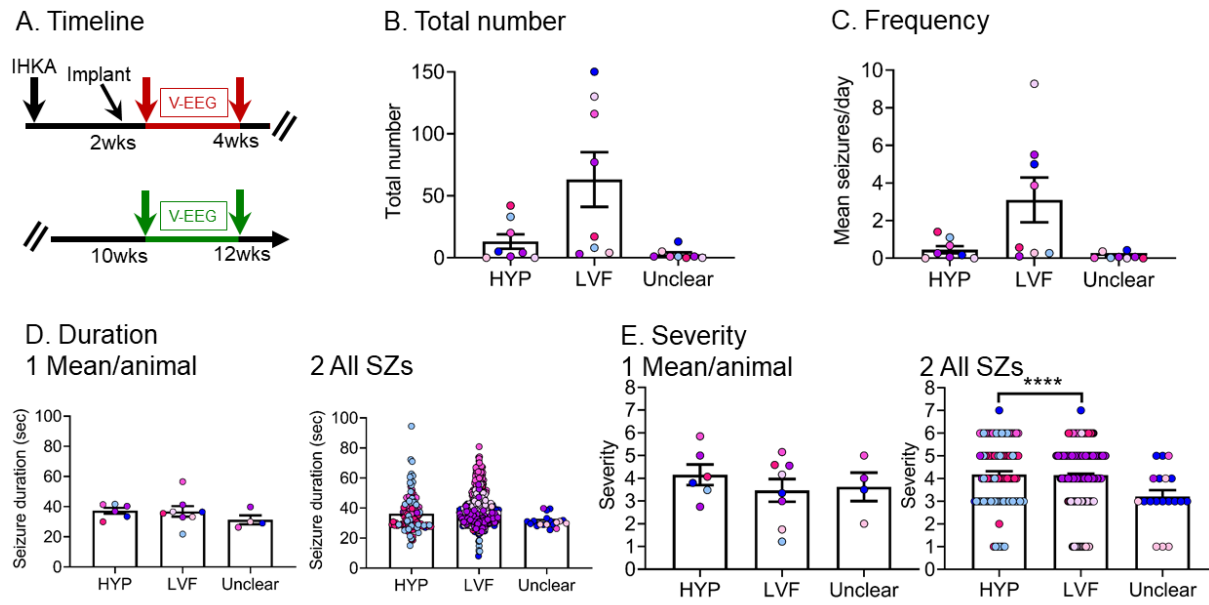

959  
 960 **Figure 8. Quantification of low-voltage fast and hypersynchronous onset seizures**  
 961 (A) Experimental timeline of the study. The data used for this figure were pooled from the 2-4 wk (red  
 962 arrows) and 10-12 wk timepoints (green arrows) and a total of 632 seizures were included in the  
 963 analyses. Seizures were distinguished as HYP, LVF, or seizure onset type was unclear. There were 8  
 964 mice (2 males, blue, recorded at both 2-4 and 10-12 wks; 6 females, pink, where 2 were recorded at  
 965 both times, and 4 were recorded only at one of the times).  
 966 (B) The total number of seizures is shown. There was no significant difference between HYP and LVF  
 967 seizures (paired t-test,  $t_{crit}=2.02$ ,  $p=0.08$ ).  
 968 (C) Same as B but the frequency of seizures is plotted. There was no significant difference between HYP  
 969 and LVF seizures (paired t-test,  $t_{crit}=2.03$ ,  $p=0.08$ ).  
 970 (D) Same as B but seizure duration is plotted. Seizure duration was calculated as an average per animal  
 971 (D1), or all seizures were pooled (D2). Neither was significant (Wilcoxon signed rank tests,  $p>0.05$ ).  
 972 (E) Same as B but seizure severity is shown. Seizure severity was calculated as an average per animal  
 973 (E1) and for all seizures (E2). HYP seizures were significantly more severe than LVF seizures when all  
 974 seizures were included (E2; Wilcoxon signed rank test,  $p<0.0001$ ). In other words, E1 was not  
 975 significant but E2 was, and that result is likely to be due to the large number of seizures in E2 compared  
 976 to animals in E1.

977  
 978 We next evaluated if there was a preference towards a particular seizure onset  
 979 pattern between the 2 different timepoints, 2-4 or 10-12 wks. Results are presented in  
 980 **Figure 9**. The total number of HYP and LVF seizures was similar between timepoints  
 981 (HYP: Wilcoxon signed rank test,  $p=0.12$ ; LVF: Wilcoxon signed rank test,  $p=0.25$ ;  
 982 **Figure 9B**). Interestingly, when the percent of HYP and LVF seizures were analyzed  
 983 instead of the total number, HYP and LVF seizures were significantly different between  
 984 timepoints with more HYP seizures dominating the earlier timepoint and more LVF  
 985 seizures dominating the later timepoint (Fisher's exact test,  $p<0.0001$ ; **Figure 9C**).

986 Regarding the frequency of LVF or HYP seizures (**Figure 9D**), HYP seizures were  
 987 more frequent at 2-4 wks (paired t-test,  $t_{crit} = 3.50$ ,  $p=0.03$ ). When all seizures were  
 988 pooled, HYP seizures recorded 10-12 wks after IHKA lasted longer than their early  
 989 counterparts (Wilcoxon signed rank test,  $p=0.02$ ; **Figure 9E2**) with no significant  
 990 differences in their severity (Wilcoxon signed rank test,  $p>0.99$ ; **Figure 9F2**). No

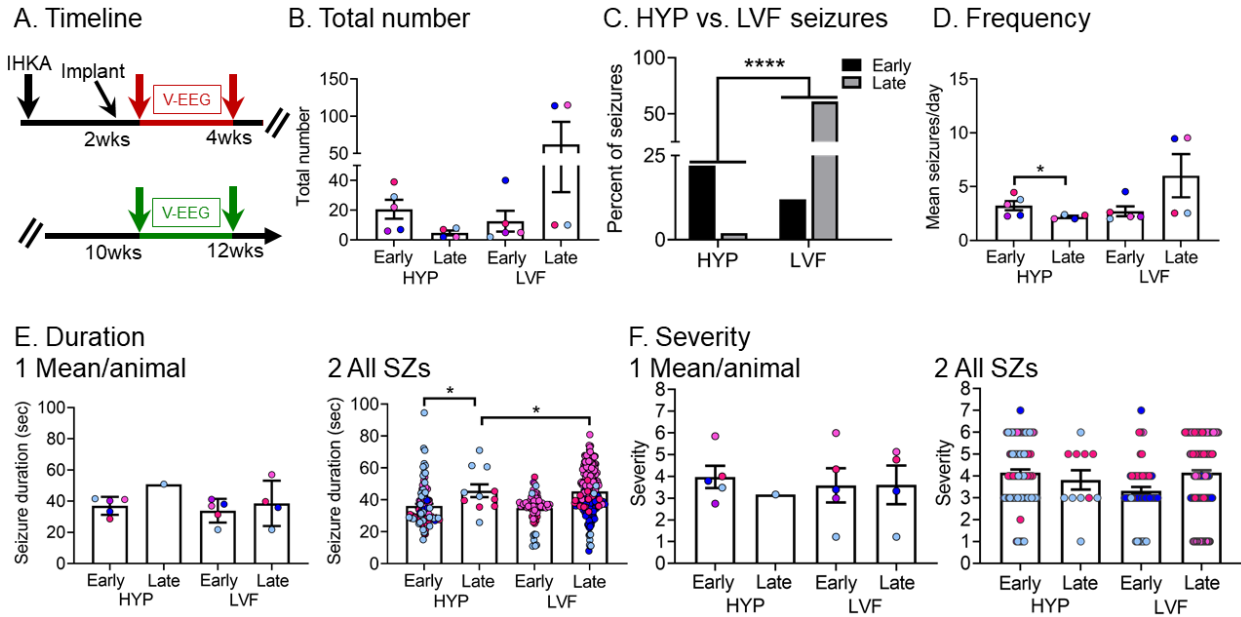

991  
992  
993 **Figure 9. Quantification of different seizure onset patterns between timepoints**

- 994 **(A)** Experimental timeline of the study. The data used for this figure were both from the 2-4 wk (red arrows)  
995 and 10-12 wk timepoint (green arrows). Seizures were distinguished as HYP or LVF. Seizures that  
996 were unclear in onset are not included in this figure because they were relatively rare (see Figure 8).  
997 **(B)** The total number of chronic HYP and LVF seizures recorded at the early (2-4 wks) and late (10-12 wks)  
998 timepoints are shown. No significant differences were found (Wilcoxon signed rank test,  $p>0.05$ ).  
999 **(C)** The percent of HYP vs. LVF seizures are shown for early and late timepoints. HYP seizures dominated  
1000 early timepoints whereas LVF seizures dominated late timepoints (Fisher's exact test,  $p<0.0001$ ).  
1001 **(D)** HYP and LVF seizure frequency was calculated as the mean number of seizures per day for each  
1002 timepoint (early, late). HYP seizures were more frequent early vs. late (paired t-test,  $t_{crit} = 3.50$ ,  $p=0.03$ ),  
1003 whereas LVF seizures did not differ between timepoints (Wilcoxon signed rank test,  $p>0.05$ ).  
1004 **(E)** HYP and LVF seizure duration was calculated as the mean number of seizures per day for each animal  
1005 at each timepoint (early, late; E1). No significant differences were found (Wilcoxon signed rank test,  
1006  $p>0.05$ ). (E2) Same as in E1 but all HYP and LVF seizures were pooled and are presented according  
1007 to timepoint and type (HYP, LVF). HYP seizures lasted longer in duration at the late timepoint (Wilcoxon  
1008 signed rank test,  $p=0.02$ ) and the late HYP seizures were longer than the late LVF seizures (Wilcoxon  
1009 signed rank test,  $p=0.02$ ).  
1010 **(F)** HYP and LVF seizure severity was calculated as the mean per animal at each timepoint (early, late;  
1011 F1). (F2) Same as in F1 but all seizures were pooled and are presented according to timepoint and  
1012 type (HYP, LVF). No significant differences were found (Wilcoxon signed rank test,  $p>0.05$ ).  
1013

1014 differences between 2-4 and 10-12 wks were found for the total number of LVF seizures  
1015 (Wilcoxon signed rank test,  $p=0.81$ ; **Figure 9B**), mean frequency (Wilcoxon signed rank  
1016 test,  $p=0.17$ ; **Figure 9D**), duration (Wilcoxon signed rank test,  $p=0.50$ ; **Figure 9E1**,  
1017 Wilcoxon signed rank test,  $p=0.81$ ; **Figure 9E2**) or severity (Wilcoxon signed rank test,  
1018  $p=0.75$ ; **Figure 9F1**, Wilcoxon signed rank test,  $p=0.75$ ; **Figure 9F2**). Similar results  
1019 were obtained when convulsive seizures were analyzed only (**Supplemental Figure 4**).  
1020 A more detailed comparison of convulsive seizure onset patterns among animals that  
1021 showed an increase ('progressed') vs. a decrease in seizures ('non-progressed')  
1022 between timepoints is shown in **Supplemental Figure 5**.  
1023

1024 **V. HFOs (>250Hz) after IHKA are frequent at the site of IHKA injection, during**  
 1025 **seizures, and also occur interictally**

1026 Additional analysis of the EEG traces revealed the presence of HFOs in the  
 1027 frequency range of 250-500 Hz. HFOs were frequent during slow wave sleep, in line  
 1028 with previously published observations (Staba et al., 2004). Examples of interictal HFOs  
 1029 are shown in **Figure 10B** and their spectral properties are shown in **Figure 10D1, D2**.  
 1030

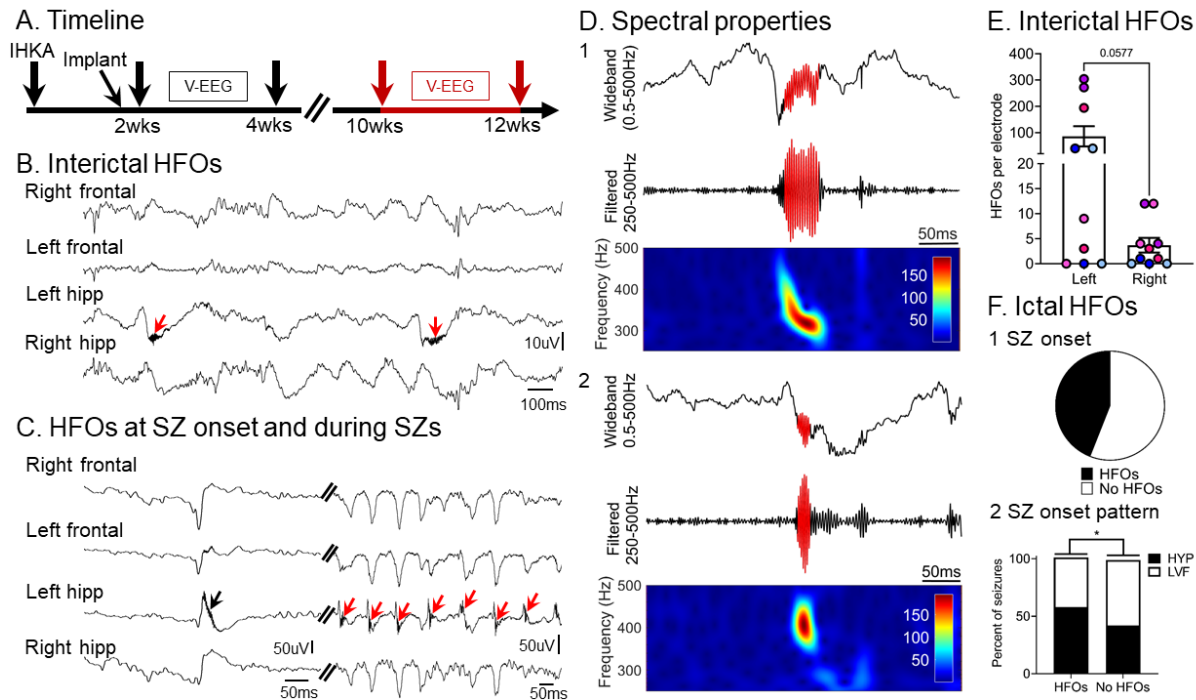

1031 **Figure 10. HFOs (>250Hz) are frequent interictally, before and during seizures, and are recorded**  
 1032 **primarily from the IHKA injection site**

- 1033 (A) Experimental timeline of the study. The data used for this figure come from the 10-12 wk timepoint (red  
 1034 arrows).  
 1035  
 1036 (B) Representative example of interictal HFOs recorded from the left hemisphere. Note the presence of  
 1037 HFOs (red arrows) in the left hippocampal lead where they were in the trough of slow waves. Note that  
 1038 interictal HFOs were not always in the trough of slow waves, however.  
 1039 (C) An example of an HFO recorded at the sentinel spike of an LVF seizure (black arrow) as well as during  
 1040 the seizure (red arrows). In this instance, HFOs were primarily recorded from the left hippocampal lead  
 1041 but this was not always the case.  
 1042 (D) Two examples of HFOs (D1, D2). For both D1 and D2, the top is wideband recording (0.5-500 Hz)  
 1043 showing coupling of HFOs to the trough of slow waves. The centers are the filtered traces (250-500  
 1044 Hz) and the bottom shows spectral properties of HFOs with frequencies >250 Hz in the 250-500 Hz  
 1045 time-frequency domain.  
 1046 (E) Quantification of HFOs (events/min) based on either the left (hippocampus or cortex) or right  
 1047 (hippocampus or cortex) electrodes. There was a tendency towards more frequent HFOs in the left  
 1048 hemisphere compared to the right, but it did not reach statistical significance (paired t-test,  $p=0.057$ ).  
 1049 (F) The percent of seizures that showed HFOs at their onset (F1). The percentage of HYP vs. LVF seizures  
 1050 that showed HFOs at seizure onset was significantly different (Fisher's exact test,  $p<0.05$ ; F2). Thus,  
 1051 a greater percent of HYP vs. LVF seizures seemed to be associated with HFOs at seizure onset  
 1052 (Fisher's exact test,  $p<0.05$ ; F2). The percentage of HYP and LVF seizures for each category (HFOs,  
 1053 no HFOs) was calculated for the total number of seizures for each seizure type (HYP or LVF).  
 1054

1055 Although HFOs tended to be more frequent in the left compared to the right  
1056 hemisphere (**Figure 10E**) this was not confirmed statistically (paired t-test,  $t_{crit} =$   
1057 Although HFOs tended to be more frequent in the left compared to the right  
1058 hemisphere (**Figure 10E**) this was not confirmed statistically (paired t-test,  $t_{crit}=2.17,$   
1059  $p=0.05$ ). Importantly, we found that interictal HFOs occurred in both sexes. The  
1060 mean number of HFOs recorded from the left hemisphere (hippocampus or cortex)  
1061 in the males was  $20\pm 11.5$  and in the females was  $130.3\pm 58.3$ . However, sex  
1062 differences were not significant (Mann-Whitney U-test,  $U = 7, p=0.32$ ).

1063 HFOs also appeared frequently at seizure onset and during seizures. An  
1064 example of HFOs recorded at seizure onset and during an LVF seizure is shown in  
1065 **Figure 10C**. Forty-four percent of all recorded seizures showed HFOs at seizure  
1066 onset (**Figure 10F1**). When we looked at the percentage of HYP vs. LVF seizures  
1067 that showed and did not show HFOs at their onset we found a significant difference  
1068 (Fisher's exact test,  $p<0.05$ ; **Figure 10F2**). Thus, a greater percent of HYP vs. LVF  
1069 seizures seemed to be associated with HFOs at seizure onset and conversely, a  
1070 greater percent of LVF vs. HYP seizures showed no HFOs at seizure onset  
1071 (Fisher's exact test,  $p<0.05$ ; **Figure 10F2**). The percentage of HYP and LVF  
1072 seizures for each category (HFOs, no HFOs) was calculated for the total number of  
1073 seizures for each seizure type (HYP or LVF). Our data suggest that HFOs may be a  
1074 better biomarker for the onset of HYP seizures than LVF seizures, which is  
1075 consistent with prior studies showing that HFOs  $>250$  Hz predominate HYP seizure  
1076 onsets primarily (Lévesque et al., 2012).

1077

## 1078 **VI. Hippocampal damage to the ipsilateral hippocampus is consistent with MTS** 1079 **and correlates with SE severity but not chronic seizure burden**

1080 To determine post-IHKA neuropathological outcomes, animals were sacrificed  
1081 at 12 wks post-IHKA (**Figure 11A**) and coronal brain sections located adjacent to  
1082 the IHKA injection site were stained with cresyl violet (**Figure 11**). Neuronal loss  
1083 was primarily in the ipsilateral hippocampus (**Figure 11B, C**) and included loss in  
1084 the hilus and pyramidal cell layers (PCL) of CA3 and CA1. Damage to the  
1085 hippocampal pyramidal cells near the IHKA injection site was estimated by  
1086 measuring the length of the PCL where neurons survived. For this purpose,  
1087 measurements were made from, the border of CA1 with the subiculum through the  
1088 entirety of CA1, CA3, and CA3, ending at the border of CA3 with the hilus  
1089 (**Supplemental Figure 1**). We found a significant reduction in PCL length after  
1090 IHKA compared to controls (Mann-Whitney U-test,  $U = 0, p=0.002, n=12$ ; **Figure**  
1091 **11D1**).

1092 To quantify granule cell dispersion, the granule cell layer (GCL) area was  
1093 measured, as well as the thickness (**Supplemental Figure 1**). There was a greater  
1094 GCL area in IHKA-treated animals compared to saline-treated controls (Mann-Whitney  
1095 U-test,  $U = 5, p=0.036$ ; **Figure 11D2**), suggesting granule cell dispersion after IHKA. In  
1096 addition, there was increased GCL thickness in IHKA-treated animals vs. saline-injected  
1097 controls (Mann-Whitney U-test,  $U = 4, p=0.024$ ; **Figure 11D3**).

1098

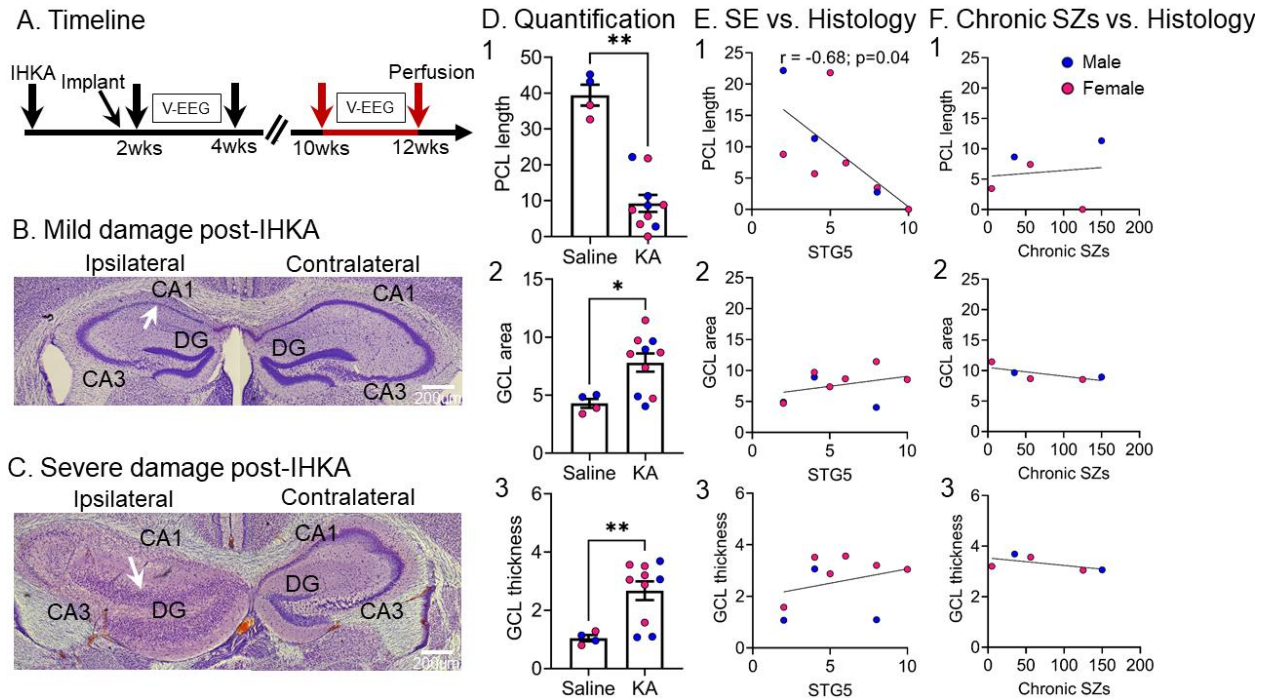

**Figure 11. Quantification of hippocampal damage at 12 wks post-IHKA**

- (A) Experimental timeline of the study indicating the time animals were perfused at 12 wks post-IHKA (red arrows). Neuronal damage was quantified based on cresyl violet-stained coronal sections that were adjacent to the IHKA injection site (-2 mm A-P,  $\pm$  1.25 mm M-L, 1.6 mm D-V) corresponding approximately to plate 47 of a standard mouse stereotaxic atlas (Franklin and Paxinos, 1997).
- (B) An example of mild hippocampal damage meaning that there was neuronal loss but less than the severe damage in C. The white arrow points to neuronal loss in the left CA1 pyramidal cell layer. Note that mild hippocampal damage was rare in the animals we studied. Calibration bar: 200  $\mu$ m.
- (C) An example of severe hippocampal damage. Note extensive neuronal loss in all pyramidal layers of the left hippocampus. Also, note extensive granule cell dispersion (white arrow). Calibration bar: 200  $\mu$ m.
- (D) Measurements of the IHKA-injected hippocampus are shown. Neuronal damage in the pyramidal cell layers was quantified by the length of the pyramidal cell layer (PCL) which did not exhibit neuronal loss. Note the reduced PCL length in IHKA vs. saline-injected animals (Mann-Whitney U-test,  $U = 0$ ,  $p = 0.002$ ; D1). Granule cell layer (GCL) area was used as a reflection of granule cell dispersion with larger GCL area in IHKA vs. saline-injected animals (Mann-Whitney U-test,  $U = 5$ ,  $p = 0.036$ ; D2) The width of the GCL was used as another measure of granule cell dispersion, confirming that the GCL is wider in IHKA vs. saline-injected animals (Mann-Whitney U-test,  $U = 4$ ,  $p = 0.024$ ; D3).
- (E) There was a significant correlation between the number of stage 5 seizures during IHKA-induced SE and PCL length ( $r = -0.68$ ,  $p = 0.04$ ; E1), but not GCL area ( $r = 0.35$ ,  $p = 0.34$ ; E2) and not GCL thickness ( $r = 0.30$ ,  $p = 0.42$ ; E3). All IHKA-injected animals were included in the analyses.
- (F) There was no significant correlation between the total number of chronic seizures (at both timepoints; 2-4 and 10-12 wks) and PCL length ( $r = 0.13$ ,  $p = 0.83$ ; F1), GCL area ( $r = -0.73$ ,  $p = 0.15$ ; F2) or GCL thickness ( $r = -0.61$ ,  $p = 0.27$ ; F3) at 12 wks post-IHKA. For the total number of chronic seizures, seizures were pooled for the two timepoints and only those animals with recordings at both timepoints are included.

To address the relationship between hippocampal damage and seizures during SE, PCL length, GCL area, and GCL thickness were plotted relative to the number of stage 5 seizures during SE (Figure 11E, F). PCL length was significantly correlated with the number of stage 5 seizures, such that PCL length was shorter when mice had more stage 5 seizures ( $r = -0.68$ ,  $p = 0.04$ ; Figure 11E1), indicating the more severe seizures

1131 during SE were associated with more neuronal loss in the PCL. The idea that more  
1132 neuronal damage occurs when SE is more severe is consistent with prior studies of SE  
1133 (Dingledine et al., 2014). GCL area was not correlated significantly with the number of  
1134 stage 5 seizures during SE ( $r=0.35$ ,  $p=0.34$ ; **Figure 11E2**) and GCL thickness was not  
1135 either ( $r=0.30$ ,  $p=0.42$ ; **Figure 11E3**). These data are consistent with the idea that GCL  
1136 dispersion may not be a result of the severity of SE but additional factors (Haas et al.,  
1137 2002; Kobow et al., 2009).

1138 To address the relationship between hippocampal damage and the number of  
1139 chronic seizures, the PCL length, GCL area, or GCL thickness were plotted relative to  
1140 the total number of chronic seizures at both timepoints (2-4 and 10-12 wks) post-IHKA  
1141 (**Figure 11F**). The correlations were not significant (PCL length:  $r=0.13$ ,  $p=0.83$ , **Figure**  
1142 **11F1**; GCL area:  $r=-0.73$ ,  $p=0.15$ , **Figure 11F2**; GCL thickness:  $r=-0.61$ ,  $p=0.27$ , **Figure**  
1143 **11F3**). The reasons that PCL length did not correlate with chronic seizure burden is  
1144 consistent with the idea that PCL neuronal loss is primarily due to SE-associated  
1145 excitotoxicity (Dingledine et al., 2014). However, one would expect more damage to  
1146 lead to more chronic seizures. The reason that estimates of GCL dispersion were not  
1147 correlated with chronic seizure burden may be due to the idea that it arises during  
1148 epileptogenesis but not as a result of chronic seizures (Haas et al., 2002; Kobow et al.,  
1149 2009).

1150

## 1151 **IV. DISCUSSION**

1152

### 1153 **A. Summary of main findings**

1154 The results suggest that our use of IHKA in mice results in robust spontaneous  
1155 convulsive seizures. The seizures are robust because of their severity and duration.  
1156 Also, animals had frequent convulsive seizures that continued for over 2 wks. In  
1157 addition, these seizures were robust because the electrographic correlates showed high  
1158 amplitude, long-lasting rhythmic activity in each of our 4 leads. These seizures ended  
1159 with postictal suppression of the EEG, which is another characteristic that supports the  
1160 description of the seizures as robust. These seizures were evident 2-4 wks after IHKA  
1161 and at 10-12 wks, but some animals showed an increase in frequency and others  
1162 showed a decrease, suggesting variability but robust epilepsy, nevertheless. Notably,  
1163 seizure duration consistently increased with time even if frequency did not, suggesting  
1164 progressively worse epilepsy depending on the type of measurement of seizures. Non-  
1165 convulsive seizures were also evident but were less frequent than convulsive seizures.  
1166 Interestingly, seizures did not appear to be focal, meaning they were not confined to  
1167 one electrode (such as the site where IHKA was infused).

1168 Convulsive seizures showed seizure onset patterns other investigators have found  
1169 in their rat models of epilepsy (Bragin et al., 1999b; Bragin et al., 2005; Lévesque et al.,  
1170 2012), as well as humans with TLE (Velasco et al., 2000; Perucca et al., 2014;  
1171 Gnatkovsky et al., 2019; Saggio et al., 2020). HFOs were frequent not only at the site of  
1172 IHKA injection but the ipsilateral cortical site, suggesting a wider epileptogenic network  
1173 beyond the IHKA injection site. Although HFOs were observed in the contralateral  
1174 hemisphere, they were relatively rare. Nevertheless, diverse sites of HFOs suggest  
1175 caution before assuming they are the site of the seizure focus, consistent with a  
1176 previous study showing HFOs outside the IHKA focus in mice (Sheybani et al., 2018).

1177 However, the rapid generalization of the seizures we recorded did not permit us to  
1178 ascertain where the focus was, and there could have been more than one focus.

1179 Histopathological findings were consistent with prior reports about the IHKA model  
1180 (Bouilleret et al., 1999), including extensive hippocampal neuronal loss in the area of  
1181 IHKA injection, like MTS. Although other types of quantification are common, such as  
1182 cell counts, our conclusion that there was extensive pyramidal cell loss would have  
1183 been clear with almost any measurement, in our view. For this reason, and to avoid the  
1184 uncertainty of cell counts in the packed cell layers, we did not count cells. We mention  
1185 in the Results that we consider the measurement of PCL damage an estimate only.  
1186 Besides neuronal loss, granule cell dispersion was also evident in our animals, as  
1187 reported before (Bouilleret et al., 1999). Far less disruption of the contralateral  
1188 hippocampus is also consistent with prior reports (Bouilleret et al., 1999).

1189

## 1190 **B. IHKA produces robust chronic epilepsy**

1191 Several electrophysiologic elements of chronic convulsive seizures reported here  
1192 are distinct from the very frequent short-lasting epileptiform abnormalities reported  
1193 before (Kim et al., 2018; Sandau et al., 2019; Lai et al., 2020). One element is seizure  
1194 duration. We provide evidence of prolonged convulsive seizures similar to seizure  
1195 durations reported in human TLE (Balish et al., 1991) and data from an Epilepsy  
1196 Monitoring Unit (Jenssen et al., 2006). The longer-lasting seizures contrast with the 3-7  
1197 sec epileptiform abnormalities reported by some past studies of IHKA in mice (Kim et  
1198 al., 2018; Sandau et al., 2019; Lai et al., 2020). In addition, our results differ from what  
1199 appears to be continuous spiking at the site of IHKA injection indicated by some  
1200 investigators (Sandau et al., 2019).

1201 Another aspect of the seizures we recorded was the presence of complex rhythmic  
1202 activity during a seizure. Thus, seizures we recorded were more complex  
1203 electrographically than some trains of spikes shown by others (Kim et al., 2018; Sandau  
1204 et al., 2019; Lai et al., 2020). For instance, our seizures showed fast and slow spikes as  
1205 well as repetitive spikes and waves at many different frequencies. These complex EEG  
1206 patterns were found for both convulsive and non-convulsive seizures. Finally, the  
1207 convulsive seizures we recorded were typically followed by prolonged post-ictal  
1208 suppression and this was not clear in studies by others (Kim et al., 2018; Sandau et al.,  
1209 2019; Lai et al., 2020).

1210 Another aspect of the EEG that we found was a characteristic of seizures (both  
1211 convulsive and non-convulsive) was that they were recorded at 4 sites, both hippocampi  
1212 and two cortical locations. In the past, many studies of the IHKA model in mice did not  
1213 use as many recording sites so less information was available (Riban et al., 2002;  
1214 Zeidler et al., 2018). On the basis of their recording sites and the lack of convulsive  
1215 behavior, conclusions were sometimes made that the model showed focal seizures  
1216 primarily (Riban et al., 2002). An important point about our recordings is that we found  
1217 synchronized activity even from the start of the seizure. This was especially clear for  
1218 LVF seizures because at the onset there is a sentinel spike.

1219 Regarding the site of the seizure focus, based on the findings from sentinel spikes,  
1220 one might argue that seizure onset is where the sentinel spike is largest, the  
1221 hippocampus. This interpretation seems logical since it was the site of IHKA injection.  
1222 However, the subdural screws for cortical recordings had less resolution than depth

1223 electrodes in the hippocampus. In addition, it has been suggested that the origin of LVF  
1224 seizures is extrahippocampal (Velasco et al., 2000).

1225 Chronic convulsive seizures were detected both at 2-4 and 10-12 wks, another  
1226 argument that chronic epilepsy was robust because convulsive seizures continued to  
1227 occur. The fact that seizures persisted is important to be noted as there is little  
1228 quantified longitudinal data of chronic seizure outcomes beyond 2 months post-IHKA in  
1229 mice (Henshall, 2017). However, 1 or 2 motor seizures a wk and seizures at 8 months  
1230 were mentioned in the text of the study of Bouilleret et al. (Bouilleret et al., 1999).

1231 We found that at 10-12 wks after IHKA, 50% of animals increased their seizure  
1232 frequency and the rest decreased their seizure frequency compared to the 2-4 wk  
1233 timepoint. None of the animals showed an absence of seizures at 10-12 wks. The  
1234 variability in seizure frequency is important because it is consistent with human TLE.  
1235 Thus, seizure diaries of patients with TLE suggest that some individuals may  
1236 experience an increase in seizures with time whereas others report a decrease (Bauer  
1237 and Burr, 2001). However, it is important to also note that patients were taking ASDs  
1238 and our animals were not. Also, seizure diaries are not as accurate as continuous  
1239 vEEG. The variable seizure frequencies we found have important implications for  
1240 preclinical drug testing, because testing is usually for only one time period, and that  
1241 lasts only 2 wks. Our data suggest that a 2 wk-long testing period may not predict  
1242 seizure frequency throughout the lifespan. Testing at different timepoints during chronic  
1243 epilepsy has been stressed by human studies already (Zimmermann and Trinkka, 2020;  
1244 Thomson et al., 2021).

1245 One study of IHKA is important to note because the investigators did study  
1246 progression of the epilepsy and no clear progression was found (Welzel et al., 2019).  
1247 Those data are consistent with our findings in that we found progression only in half of  
1248 the animals.

1249

### 1250 **C. Chronic IHKA seizures show different seizure onset patterns**

1251 The original studies of IHKA in mice have suggested no changes in seizure patterns  
1252 with time (Bouilleret et al., 1999). However, a limitation to assess this might be related  
1253 to the fact that convulsive seizures were rare, or discontinuous vEEG with minimal  
1254 bilateral recording was employed (Bouilleret et al., 1999; Riban et al., 2002). Different  
1255 chronic seizure onset patterns were evident in the same animal, and almost all seizures  
1256 could be categorized as LVF or HYP. Importantly, seizure onset patterns resembled  
1257 those in TLE (Velasco et al., 2000; Gnatkovsky et al., 2019) and following IHKA in rats  
1258 (Bragin et al., 1999b; Bragin et al., 2005; Lévesque et al., 2012). Our results suggest  
1259 that the prevalence of LVF or HYP seizures in an animal may change with time, a  
1260 finding that is consistent with earlier observations in the rat pilocarpine- and IHKA-  
1261 treated rats (Bragin et al., 1999b). This is important to be noted as it suggests changes  
1262 in the seizure-generating network as epilepsy continues. On the other hand,  
1263 characteristics of the LVF or HYP seizures did not significantly change. For example,  
1264 both seizure types continued to be accompanied by stage 4-5 convulsions and were  
1265 followed by prolonged postictal depression. On the other hand, HYP seizure duration  
1266 increased with time. Therefore, the data presented here suggest that once initiated,  
1267 HYP seizures may reverberate more with time, leading to a prolongation of the HYP  
1268 seizure.



1269 **D. High frequency oscillations (HFOs) occurred during seizures, at seizure**  
1270 **onsets, as well as interictally**

1271 HFOs are considered hallmarks of epileptogenicity by numerous clinical (Jacobs et  
1272 al., 2008; Weiss et al., 2016) and animal (Bragin et al., 1999a) studies and are currently  
1273 used in the presurgical evaluation of patients with epilepsy (Zijlmans et al., 2019).  
1274 Although definitions and terms vary, we defined HFOs in a way that distinguished them  
1275 from most normal oscillations that have high frequency, such as those between 100 and  
1276 200 Hz. Our definition was >250 Hz. We also used spectrograms to ensure peak  
1277 frequency was indeed above 250 Hz. Note that others have used the term “pathological  
1278 HFO (pHFO)” to refer to HFOs in epilepsy, but we have avoided that term because  
1279 some HFOs occur in normal tissue (Engel et al., 2009; Pearce et al., 2014).

1280 HFOs in our study were present at seizure onsets and during seizures, which has  
1281 been reported in acute and chronic IHKA-induced seizures in the rat (Bragin et al.,  
1282 1999b; Lévesque et al., 2012; Li et al., 2018) and in TLE (Weiss et al., 2016). We found  
1283 frequent HFOs during periods of slow wave activity similar to reports of HFOs during  
1284 delta activity in humans (Staba et al., 2004) and rats (Bragin et al., 1999a; Bragin et al.,  
1285 2016). Importantly the NREM stage of sleep where delta oscillations are prominent  
1286 appears to be the most useful to identify the seizure onset zone in TLE (Klimes et al.,  
1287 2019). We also report HFOs outside the IHKA injection site, which suggests a wider  
1288 epileptogenic network involving adjacent cortical and remote hippocampal areas  
1289 (Sheybani et al., 2018).

1290 There is currently only one mouse IHKA study that reported HFOs, but it mostly  
1291 focused on power (Häussler et al., 2012) rather than the identification of individual HFO  
1292 events during sleep, which is standard for the detection and evaluation of HFOs in  
1293 clinical practice (Frauscher et al., 2017). Importantly, we found that both male and  
1294 female mice showed HFOs. This is important because both sexes have not been  
1295 studied before. These data suggest that HFOs, an abnormality with an important  
1296 translational value, are in both sexes. The findings support the increasing need to  
1297 expand the bandwidth normally used for preclinical studies to capture high frequency  
1298 abnormalities in the EEG of animals with epilepsy.

1299  
1300 **E. Hippocampal pathology at the IHKA injection site was consistent with Mesial**  
1301 **Temporal Sclerosis (MTS)**

1302 Human tissue from many patients with intractable TLE shows extensive pyramidal  
1303 cell loss. The pattern called MTS is characterized by neuronal death primarily in the  
1304 hilus, CA3 and CA1 (Houser, 1999; Scharfman and Pedley, 2006; Blümcke et al., 2012;  
1305 Thom, 2014). In addition, the dentate gyrus is characterized by granule cell dispersion  
1306 (Houser, 1990; Suzuki et al., 1995; Bouilleret et al., 1999; Riban et al., 2002). The  
1307 original studies of IHKA showed extensive pyramidal cell loss and granule cell  
1308 dispersion near the site of IHKA injection, with little evidence of neuropathology in the  
1309 contralateral hippocampus (Suzuki et al., 1995; Bouilleret et al., 1999). In the animals  
1310 that we studied after IHKA, we also saw extensive pyramidal cell loss near the site of  
1311 IHKA injection, although there was variability. Quantification showed a significant  
1312 reduction in pyramidal cells near the IHKA injection site in both CA3 and CA1, like MTS.  
1313 We also observed significant granule cell dispersion in most animals, and when

1314 quantified, granule cell dispersion was reflected by an increase in granule cell area and  
1315 thickness (post-IHKA compared to saline).

1316 The mechanisms by which KA induces cell death in pyramidal layers are thought to  
1317 be excitotoxicity mediated by KA receptors, and due to prolonged seizures (Ben-Ari et  
1318 al., 1980). To address a possible correlation between histopathology and seizures  
1319 during SE, we plotted the number of stage 5 seizures during IHKA-induced SE and  
1320 histopathological measurements (pyramidal cell length, GCL area, and GCL average  
1321 thickness). We also plotted the relation between chronic seizures and histopathological  
1322 measurements. The data showed a significant correlation between neuronal loss in the  
1323 pyramidal cell layers and the number of stage 5 seizures during SE. The results are  
1324 similar to those of the intraamygdala KA model in rats (Ben-Ari et al., 1980; Henshall et  
1325 al., 2000) and mice (Araki et al., 2002) although in prior studies the investigators used  
1326 other methods to quantify neuronal damage than the ones we implemented. Together  
1327 these data support the idea that severe SE is needed for the neuronal loss in the  
1328 pyramidal cell layers (Dingledine et al., 2014). This is notable because a long-standing  
1329 assumption is that chronic epilepsy is more likely when there is greater neuronal loss  
1330 (Dingledine et al., 2014).

1331 It is important to note that we evaluated pyramidal cell loss at the end of our  
1332 experiments, typically 12 wks post-IHKA. Others typically examine neuronal loss in the  
1333 days following SE (Ben-Ari et al., 1980; Henshall et al., 2000; Araki et al., 2002).  
1334 However, we did assess some animals at early times and the neuronal loss in the  
1335 pyramidal cell layer was similar. Moreover, in SE models the vast majority of neuronal  
1336 loss occurs within 10 days of SE so we do not think that examining mice after 12 wks  
1337 was a major limitation.

1338 In contrast to the length of the pyramidal cell layer, measurements of granule cell  
1339 dispersion were not correlated with acute or chronic seizures. This lack of correlation in  
1340 our data might be attributed to the fact that granule cell dispersion is an alteration which  
1341 is not dependent on SE severity or chronic seizures. Alternatively, the measures of SE  
1342 or chronic seizures may not have been those that are related to granule cell dispersion.  
1343 For example, we did not measure the power or duration of SE but the number of stage 5  
1344 seizures during SE because the animals were not vEEG monitored during SE. Power  
1345 and duration of SE may be more sensitive as a measure of SE severity than the number  
1346 of individual convulsive seizures. The same could be true of chronic seizures. On the  
1347 other hand, the mechanisms underlying granule cell dispersion may be initiated by the  
1348 way KA receptors modify the granule cells, independent of SE convulsive seizures or  
1349 chronic epilepsy. Other possibilities also exist, based on proposed mechanisms for  
1350 granule cell dispersion (Haas et al., 2002).

1351

## 1352 **F. Using IHKA to induce robust chronic epilepsy in mice**

1353 Our data suggest that the IHKA model in mice induces robust chronic epilepsy,  
1354 unlike several past reports where chronic convulsive seizures are not noted, or the EEG  
1355 evidence does not clearly reflect robust seizures (Kiasalari et al., 2016; Zhu et al., 2016;  
1356 Runtz et al., 2018; Bielefeld et al., 2019; Li et al., 2020). Notably, some investigators  
1357 have stated that they see chronic epilepsy after IHKA, but the evidence is not always  
1358 presented (Kim et al., 2018; Sandau et al., 2019; Lai et al., 2020).

1359 Why would our methods lead to more convulsive seizures after IHKA-SE than other  
1360 methods? One potential explanation is related to the fact that our animals sustained  
1361 IHKA-SE with multiple stage 5 seizures. In some other studies of IHKA, non-convulsive  
1362 SE was reported (Bouilleret et al., 1999; Riban et al., 2002; Arabadzisz et al., 2005;  
1363 Maroso et al., 2011). If it is true that there is more neuronal loss when there are more  
1364 convulsive seizures during SE, and furthermore if it is true that the greater neuronal loss  
1365 is, the more robust the chronic seizures, then our initiation of IHKA-SE with many stage  
1366 5 seizures could have led to more robust epilepsy.

1367 Another possibility is that we did not implant animals with electrodes or cannula  
1368 prior to SE (or immediately after IHKA injection), which is notable because in the past  
1369 we have found that implanted animals have a higher seizure threshold ((Jain et al.,  
1370 2019) and HES, unpublished).

1371 We also handled mice more than is typical. Thus, we handled mice once or twice  
1372 per day for the 2 days before IHKA injection and a longer time period afterwards to  
1373 account for the behavioral stress related to the lack of social housing (Bernard, 2019;  
1374 Manouze et al., 2019). Animals also were housed with miniature enclosures so that  
1375 animals could enter the enclosure and not be seen. This type of environment would be  
1376 likely to lower behavioral stress even more. A study in the pilocarpine model suggested  
1377 that single housing may increase seizures by a factor of 16 (Manouze et al., 2019).  
1378 Single housing might thus explain why very frequent and brief (3-7 sec) epileptiform  
1379 abnormalities have been reported in IHKA-treated mice in the past (Kim et al., 2018;  
1380 Sandau et al., 2019; Lai et al., 2020; Rusina et al., 2021). It would be possible that our  
1381 approach that included frequent handling combined with enriched housing reduced  
1382 these very frequent abnormalities thereby allowing the expression of robust seizures.  
1383 These ideas are consistent with past studies suggesting that stress plays a major role in  
1384 seizure induction and in chronic epilepsy in both animals (MacKenzie and Maguire,  
1385 2015) and humans (Lang et al., 2018), although the relationship between stress and  
1386 seizures/epilepsy is complex (Gunn and Baram, 2017).

1387 Another factor is that we modified the pH of the solution of KA we injected so it was  
1388 closer to a physiological pH. In the past, the pH may not have been monitored, and if  
1389 not, a very acidic solution would have been injected because the pH of our solution,  
1390 before adding a base to bring it closer to the physiological range, was approximately  
1391 4.0. In the past, we found that bringing the solution of pilocarpine to pH 7.4 before  
1392 injection played a very large role in the consequences of pilocarpine with fewer seizures  
1393 when pH was not controlled (Scharfman et al., unpublished). Finally, we found that  
1394 seizures can be robust, but if a time when seizures are limited is the only time that is  
1395 studied, one might get a false sense of few seizures when animals actually had robust  
1396 epilepsy at other times.

1397

## 1398 **G. Limitations of the study**

1399 One of the limitations of our study is that some mice were transgenic. However, the  
1400 mice were designed to express Cre recombinase conditionally, and only in small groups  
1401 of neurons. Since we did not conditionally activate Cre, we assume the mice that were  
1402 hemizygous acted like the background strain, C57BL/6. In addition, wild type mice were  
1403 also used. In fact, we found no evidence that the hemizygous and wild type mice

1404 differed in acute effects of SE or chronic seizures. Therefore, we do not think the use of  
1405 transgenic mice was a major limitation.

1406 We also did not assess the EEG during SE, because all mice exhibited robust  
1407 convulsive SE. Also, the presence of cannulas and electrodes could have influenced  
1408 SE.

1409

## 1410 **ACKNOWLEDGEMENTS**

1411

1412 We thank Drs. Annamaria Vezzani, Esther Krook-Magnuson, Ivan Soltesz, and Peter  
1413 West for sharing their methods for injecting KA in mice. We also thank members of the  
1414 Scharfman lab for fruitful discussions and John LaFrancois for sharing his method for  
1415 intrahippocampal injection in mice. This work was supported by the National Institutes of  
1416 Health [grant number NIH R01 NS106983] and the New York State Office of Mental  
1417 Health.

1418

## 1419 **CONTRIBUTION OF AUTHORS**

1420

1421 **Christos P. Lisgaras and Helen E. Scharfman:** Conceptualization, **Christos P.**  
1422 **Lisgaras:** Data curation, **Christos P. Lisgaras and Helen E. Scharfman:** Formal  
1423 analysis; **Helen E. Scharfman:** Funding acquisition, **Christos P. Lisgaras:**  
1424 Investigation; **Christos P. Lisgaras:** Methodology, **Helen E. Scharfman:** Project  
1425 administration, **Helen E. Scharfman:** Resources, **Christos P. Lisgaras:** Software,  
1426 **Helen E. Scharfman:** Supervision, **Christos Panagiotis Lisgaras:** Validation,  
1427 **Christos P. Lisgaras and Helen E. Scharfman:** Visualization, **Christos P. Lisgaras:**  
1428 Roles/Writing - original draft, **Helen E. Scharfman and Christos P. Lisgaras:** Writing -  
1429 review & editing.

1430 **Table 1. Animals included in the study**

1431

| Animal number | Subject ID | Sex    | Genotype | Experimental use | Treatment | Dose (nL) | Times of EEG recording | Times of anatomical assessment |
|---------------|------------|--------|----------|------------------|-----------|-----------|------------------------|--------------------------------|
| 1             | 78a-5      | Male   | Cre -/-  | EEG, Anatomy     | KA        | 80        | 2 wks, 10 wks          | 12 wks                         |
| 2             | 76-1       | Female | Cre +/-  | EEG, Anatomy     | KA        | 100       | 2 wks                  | 10 wks                         |
| 3             | 76-4       | Female | Cre -/-  | EEG, Anatomy     | KA        | 100       | 2 wks, 10 wks          | 12 wks                         |
| 4             | 75a-5      | Male   | Cre +/-  | EEG, Anatomy     | KA        | 100       | 2 wks, 10 wks          | 12 wks                         |
| 5             | 77-2       | Female | Cre +/-  | EEG, Anatomy     | KA        | 100       | 2 wks, 10 wks          | 12 wks                         |
| 6             | 78-3       | Female | Cre -/-  | EEG, Anatomy     | KA        | 70        | 10 wks                 | 12 wks                         |
| 7             | 78a-6      | Male   | Cre +/-  | Anatomy          | KA        | 75        | NA                     | 3 wks                          |
| 8             | 79a-6      | Male   | Cre -/-  | Anatomy          | KA        | 70        | NA                     | 3 days                         |
| 9             | 80-4       | Female | Cre -/-  | EEG, Anatomy     | KA        | 70        | 10 wks                 | 12 wks                         |
| 10            | 81-1       | Female | Cre -/-  | EEG, Anatomy     | KA        | 70        | 10 wks                 | 12 wks                         |
| 11            | 82-1       | Female | Cre +/-  | Anatomy          | Saline    | 100       | NA                     | 2 wks                          |
| 12            | 82-2       | Female | Cre +/-  | Anatomy          | Saline    | 100       | NA                     | 2 wks                          |
| 13            | 82a-3      | Male   | Cre -/-  | Anatomy          | Saline    | 80        | NA                     | 3 days                         |
| 14            | 82a-4      | Male   | Cre -/-  | Anatomy          | Saline    | 100       | NA                     | 4 wks                          |

1432

1433 **Table 1 Legend.** Animals included in the study. For each animal we note the identification number, sex, genotype, experimental use, treatment (KA,  
 1434 saline), dose (nL of KA or saline), times of EEG recording and anatomical assessment. The dosing varied because pilot studies showed that doses  
 1435 between 70 and 100 nL all were successful in producing severe SE and in addition no correlation was found between dosing and the total number  
 1436 of chronic seizures ( $r=0.19$ ,  $p=0.64$ ). Therefore, doses were randomly assigned for this study. Orange: IHKA animals; Blue: saline-injected controls.  
 1437 NA: Not applicable.

1438

1439

1440

1441

1442

1443

1444

1445

1446

1447

1448

1449 **Table 2. Variables for induction of IHKA-SE and chronic epilepsy outcomes**

1450

| Animal number | Subject ID | Sex    | Genotype | Experimental use | Treatment | Dose (nL) | Total duration of anesthesia (min) | Latency to Stg 5 (min) from IHKA injection | Total number of Stg5 during SE | Total number of chronic seizures | Administration of 0.9% saline s.c. post-IHKA |
|---------------|------------|--------|----------|------------------|-----------|-----------|------------------------------------|--------------------------------------------|--------------------------------|----------------------------------|----------------------------------------------|
| 1             | 78a-5      | Male   | Cre -/-  | EEG, Anatomy     | KA        | 80        | 22                                 | 44                                         | 19                             | 46                               | Yes                                          |
| 2             | 76-1       | Female | Cre +/-  | EEG, Anatomy     | KA        | 100       | 17                                 | 28                                         | 8                              | 8                                | No                                           |
| 3             | 76-4       | Female | Cre -/-  | EEG, Anatomy     | KA        | 100       | 15                                 | 27                                         | 10                             | 136                              | Yes                                          |
| 4             | 75a-5      | Male   | Cre +/-  | EEG, Anatomy     | KA        | 100       | 17                                 | 11                                         | 4                              | 168                              | No                                           |
| 5             | 77-2       | Female | Cre +/-  | EEG, Anatomy     | KA        | 100       | 15                                 | 42                                         | 6                              | 59                               | Yes                                          |
| 6             | 78-3       | Female | Cre -/-  | EEG, Anatomy     | KA        | 70        | 16                                 | 49                                         | 5                              | 132                              | No                                           |
| 7             | 78a-6      | Male   | Cre +/-  | Anatomy          | KA        | 75        | 20                                 | 63                                         | 2                              | NA                               | No                                           |
| 8             | 79a-6      | Male   | Cre -/-  | Anatomy          | KA        | 70        | 17                                 | 39                                         | 8                              | NA                               | No                                           |
| 9             | 80-4       | Female | Cre -/-  | EEG, Anatomy     | KA        | 70        | 19                                 | 66                                         | 4                              | 8                                | No                                           |
| 10            | 81-1       | Female | Cre -/-  | EEG, Anatomy     | KA        | 70        | 19                                 | 79                                         | 2                              | 79                               | No                                           |
| 11            | 82-1       | Female | Cre +/-  | Anatomy          | Saline    | 100       | 21                                 | NA                                         | NA                             | NA                               | NA                                           |
| 12            | 82-2       | Female | Cre +/-  | Anatomy          | Saline    | 100       | 21                                 | NA                                         | NA                             | NA                               | NA                                           |
| 13            | 82a-3      | Male   | Cre -/-  | Anatomy          | Saline    | 80        | 21                                 | NA                                         | NA                             | NA                               | NA                                           |
| 14            | 82a-4      | Male   | Cre -/-  | Anatomy          | Saline    | 100       | 19                                 | NA                                         | NA                             | NA                               | NA                                           |

1451

1452 **Table 2 Legend.** For each animal we note the subject ID, sex, genotype, experimental use, treatment (KA, saline), dose (nL of KA or saline), total  
 1453 duration of anesthesia (defined as the time anesthesia started to the time anesthesia ended), latency to the first stage 5 seizure (defined as the time  
 1454 to a stage 5 convulsion after the end of anesthesia). We also note the total number of stage 5 seizures and chronic seizures (2-4 and 10-12 wk  
 1455 seizures were pooled). We also note whether animals were administered with 0.9% of saline s.c. after IHKA (typically the day after IHKA i.e., 24 hrs  
 1456 post-IHKA).

1457 **IHKA dose:** There was no significant correlation between IHKA dose and the total number of stage 5 seizures during SE ( $r=0.18$ ,  $p=0.6$ ), suggesting  
 1458 the dose had little influence on the severity of SE.

1459 **Anesthesia:** There were no significant correlations between the total duration of anesthesia and the latency to the first stage 5 seizure ( $r=0.40$ ,  
 1460  $p=0.31$ ), the total number of stage 5 seizures during SE ( $r=0.27$ ,  $p=0.43$ ), or the total number of chronic seizures ( $r=-0.43$ ,  $p=0.28$ ), suggesting that  
 1461 the duration of anesthesia had little influence on outcome after IHKA.

1462 **Latency to the first stage 5 and number of stage 5 seizures during SE:** Like the lack of correlation between anesthesia and latency to the first  
 1463 stage 5 seizure, there was no correlation between the latency to the first stage 5 and the total number of stage 5 seizures during SE ( $r=-0.34$ ,  $p=0.33$ )  
 1464 or total number of chronic seizures ( $r=-0.43$ ,  $p=0.28$ ). These data suggest little effect of the latency of the first stage 5 seizures on the severity of SE  
 1465 or subsequent chronic seizures. The total number of stage 5 seizures during SE was not correlated with the total number of chronic seizures ( $r=-$   
 1466  $0.19$ ,  $p=0.64$ ) which is surprising because one might expect more severe SE to lead to more severe epilepsy.

1467 **Genotype:** We did not find any statistically significant differences between animals that were Cre  $-/-$  (n=6) or Cre  $+/-$  (n=4) in terms of the latency to  
1468 the first stage 5 seizure (Mann-Whitney U-test,  $U = 7$ ,  $p=0.35$ ) or the total number of stage 5 seizures during SE (Mann-Whitney U-test,  $U = 8.5$ ,  
1469  $p=0.50$ ). Also, the total number of chronic seizures was not different between Cre  $-/-$  (n=5) vs. Cre $+/-$  (n=3) animals (Mann-Whitney U-test,  $U = 7.5$ ,  
1470  $p>0.99$ ). These data suggest Cre $-/-$  and Cre $+/-$  mice were similar, regarding the measurements in this table.  
1471 **Administration of saline:** Animals that received saline s.c. the day after IHKA (n=3) because of transient body weight loss were similar to those  
1472 that did not (n=5) in terms of total number of chronic seizures (Mann-Whitney U-test,  $U = 7$ ,  $p=0.92$ ).  
1473 Orange: IHKA animals; Blue: saline-injected controls. NA: Not applicable.  
1474

1475 **SUPPLEMENTAL MATERIAL**

1476

A. Pyramidal cell length and granule cell layer area

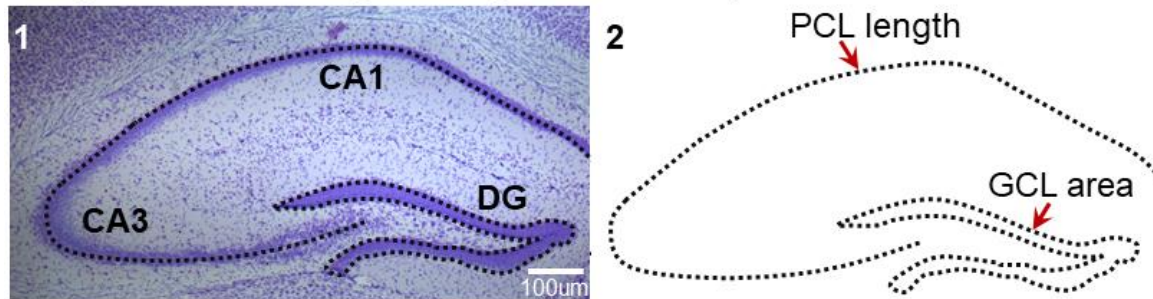

B. Upper blade and lower blade thickness

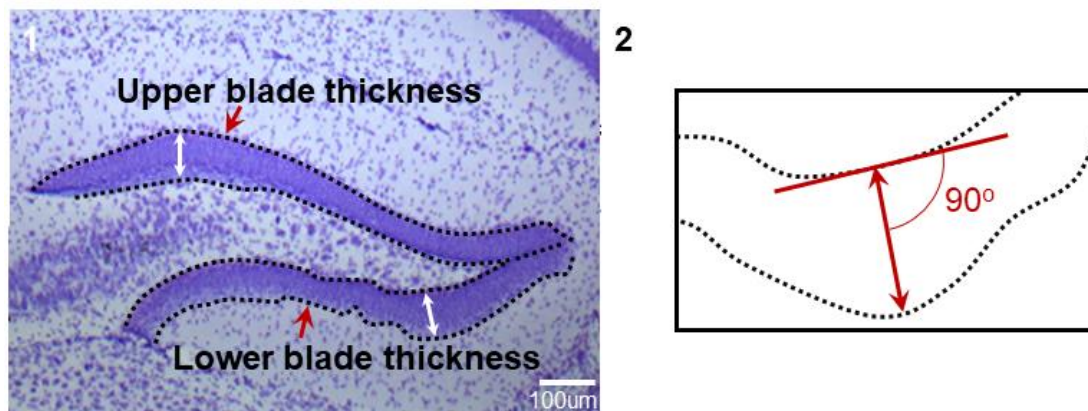

1477

1478

1479

**Supplemental Figure 1. Quantification of hippocampal pathology 12 wks post-IHKA**

1480 Methods used for cresyl violet-stained sections from dorsal hippocampus near the area of the IHKA  
1481 injection. Measurements were made using ImageJ as discussed in the Methods.

1482 **(A)** A cresyl violet-stained section (A1) and the same image without the stained section (A2) shows the  
1483 lines used for measurements. For pyramidal cell length (PCL), a line was drawn using the freehand line  
1484 tool from CA3c to the end of CA1. The line included those areas where pyramidal cells were contiguous,  
1485 i.e., there was <1 soma width between cell bodies. The CA1 border with the subiculum and the CA3c  
1486 border with the hilus was the end of CA1 and CA3c respectively. These areas were defined in the  
1487 Methods. For the measurement of the granule cell layer (GCL) area, we traced the borders of the GCL  
1488 using the freehand tool and calculated the area within the borders. The border of the GCL and hilus  
1489 and border of the GCL and IML were defined by the point where adjacent cells became >1 GC soma  
1490 width apart.

1491 **(B)** For GCL width, we used the straight-line tool to measure the thickest part of the upper and lower blade  
1492 (red arrows; B1) based on the traced borders of GCL. The white line with arrows (B1) was perpendicular  
1493 to the length of the GCL as shown in B2. We averaged 2 measurements for an estimate of upper blade  
1494 width of a section and then did the same procedure for the lower blade to yield the estimate for the  
1495 lower blade width of that section.



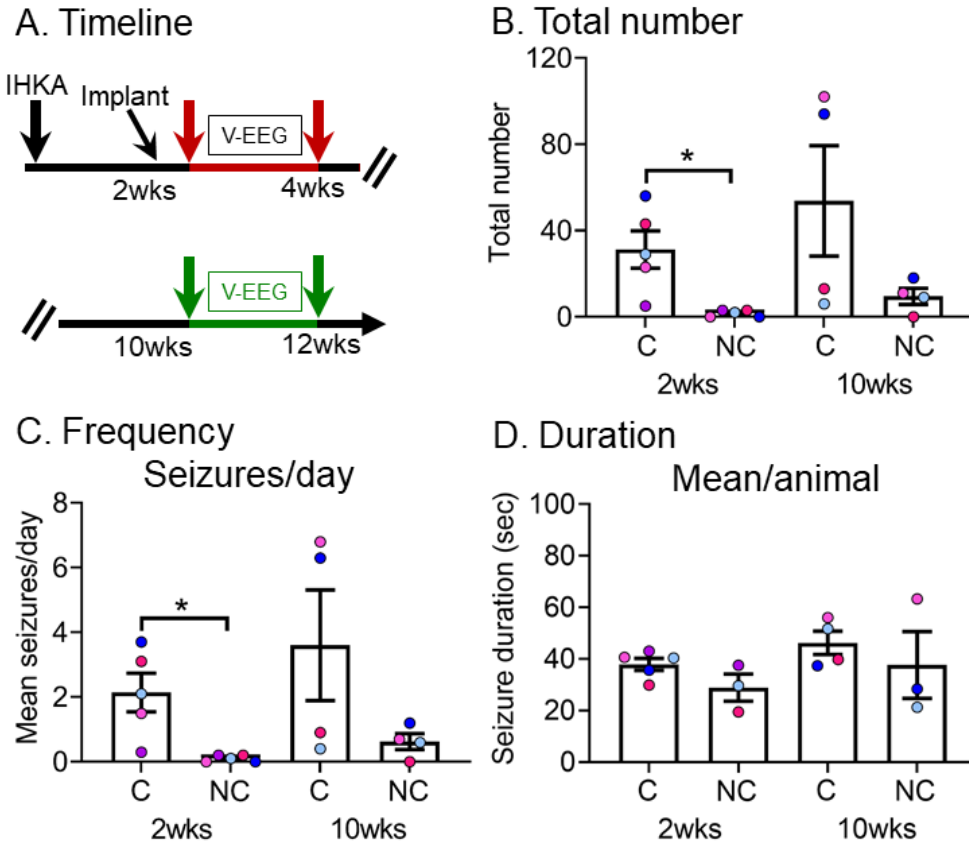

1496  
1497

**Supplemental Figure 2. Quantification of convulsive and non-convulsive seizures for 2-4 and 10-12 wks post-IHKA for animals that recorded at both timepoints**

- 1498  
1499  
1500 (A) Experimental timeline shows the times when measurements were made; 2-4 wks (red arrows) and 10-  
1501 12 wks (green arrows) post-IHKA.  
1502 (B) The total number of chronic convulsive and non-convulsive seizures recorded during 2 wks of  
1503 continuous vEEG is shown for the 2-4 wk timepoint (n=5 animals; 2 males, light and royal blue; 3  
1504 females, pink and red) and 10-12 wk timepoint (n=4 animals; 2 males, 2 females). These animals were  
1505 the same except for one that was removed from the study and therefore could not be included in the  
1506 10-12 wk timepoint. The number of convulsive seizures was significantly greater than the number of  
1507 non-convulsive seizures (paired t-test,  $t_{crit}$  3.29,  $p=0.030$ ), suggesting that the majority of seizures were  
1508 convulsive.  
1509 (C) Same as B, but seizure frequency is shown. The frequency of convulsive seizures was significantly  
1510 greater than non-convulsive seizures (paired t-test,  $t_{crit}$  3.32,  $p=0.029$ ), again suggesting that there were  
1511 more convulsive seizures in the animals.  
1512 (D) Same as C, but seizure duration is shown. Seizure duration was calculated as an average per animal.  
1513 The duration of convulsive or non-convulsive seizures did not differ between timepoints (convulsive:  
1514 Wilcoxon signed rank test,  $p=0.25$ ; non-convulsive: Wilcoxon signed rank test,  $p>0.99$ ). Note that  
1515 elsewhere we discuss that seizure duration increases with time so these data might seem not to support  
1516 that idea. However, we note elsewhere that it is only when seizures are differentiated between HYP  
1517 and LVF that there is an ability to see increased seizure duration with time.

A. Convulsive seizures  
2-4wks vs 10-12wks

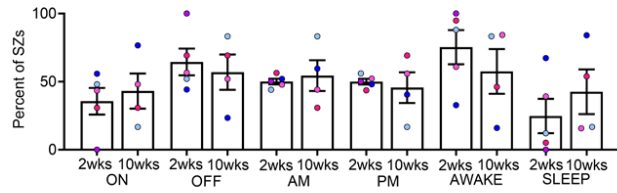

C. Convulsive vs non-convulsive seizures  
2-4wks

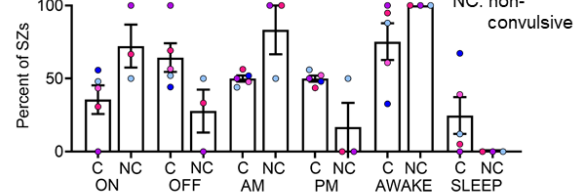

B. Non-convulsive seizures  
2-4wks vs 10-12wks

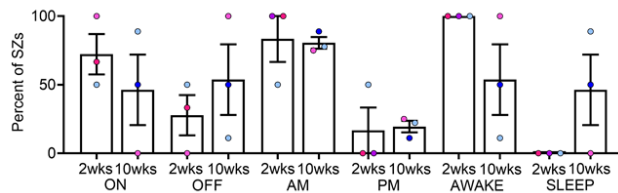

D. Convulsive vs non-convulsive seizures  
10-12wks

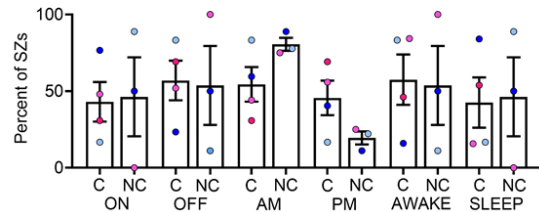

1518  
1519

**Supplemental Figure 3. Percent of convulsive and non-convulsive seizures at the two time points (2-4, 10-12 wks): effects of light, time of day and sleep.**

- 1522 (A) Percent of convulsive seizures that occurred when lights were on or off, a.m. or p.m., and awake or  
1523 sleep for the two time points (2-4 and 10-12 wks). Only animals recorded at both timepoints are  
1524 included.
- 1525 (B) Same as in A but for non-convulsive seizures.
- 1526 (C) Data were compared using just the 2-4 wk timepoint.
- 1527 (D) Same as C, but for the 10-12 wk timepoint. There were no significant differences (paired t-tests,  $p > 0.05$ )  
1528 most likely due to the variability from one animal to the next.

1529  
1530  
1531  
1532  
1533  
1534

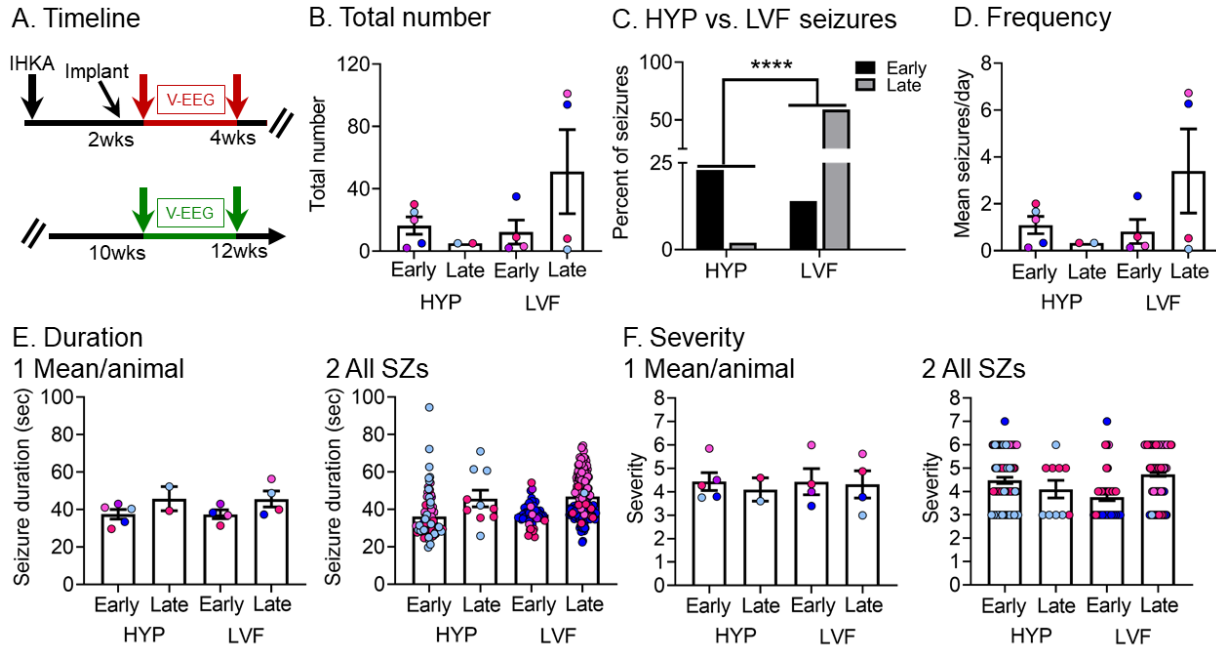

1535  
1536  
1537  
1538  
1539  
1540  
1541  
1542  
1543  
1544  
1545  
1546  
1547  
1548  
1549  
1550  
1551  
1552  
1553  
1554  
1555  
1556  
1557

**Supplemental Figure 4. Seizure onset patterns at 2-4 and 10-12 wks for convulsive seizures only**

- (A)** Experimental timeline of the study. Data from the early (red arrows) and late (green arrows) timepoint are included in this figure. There were 5 mice at 2-4 wks (3 males, 2 females). The same mice were recorded at 10-12 wks except for one of the males that could not be recorded at 10-12 wks.
- (B)** The total number of chronic convulsive HYP and LVF seizures recorded during 2-4 wks and 10-12 wks. No significant differences were found for LVF seizures between the 2 timepoints (Wilcoxon signed rank test,  $p=0.5$ ). Statistical comparisons for HYP seizures were not possible because of the small sample size of HYP seizures at the late timepoint.
- (C)** Percent of HYP and LVF seizures at the 2-4 and 10-12 wk timepoints. The percent of HYP vs. LVF seizures is different between timepoints with HYP seizures dominating the earlier timepoint and LVF seizures the late timepoint (Fisher's exact test,  $p<0.0001$ ).
- (D)** Same as B, but convulsive seizure frequency is shown. The frequency of LVF seizures did not change between timepoints (Wilcoxon signed rank test,  $p=0.25$ ).
- (E)** Same as B, but convulsive seizure duration is plotted. Seizure duration was calculated as the average per animal in E1 and for all seizures in E2. No significant differences were found for LVF seizures between the 2 timepoints (Wilcoxon signed rank test,  $p=0.50$ ). Statistical comparisons for HYP seizures were not possible because of the small sample size of HYP seizures at the late timepoint.
- (F)** Same as B, but convulsive seizure severity is shown. Convulsive seizure severity was calculated as the average per animal in F1 and for all seizures in F2. There were no significant differences (Wilcoxon signed rank tests,  $p>0.05$ ).

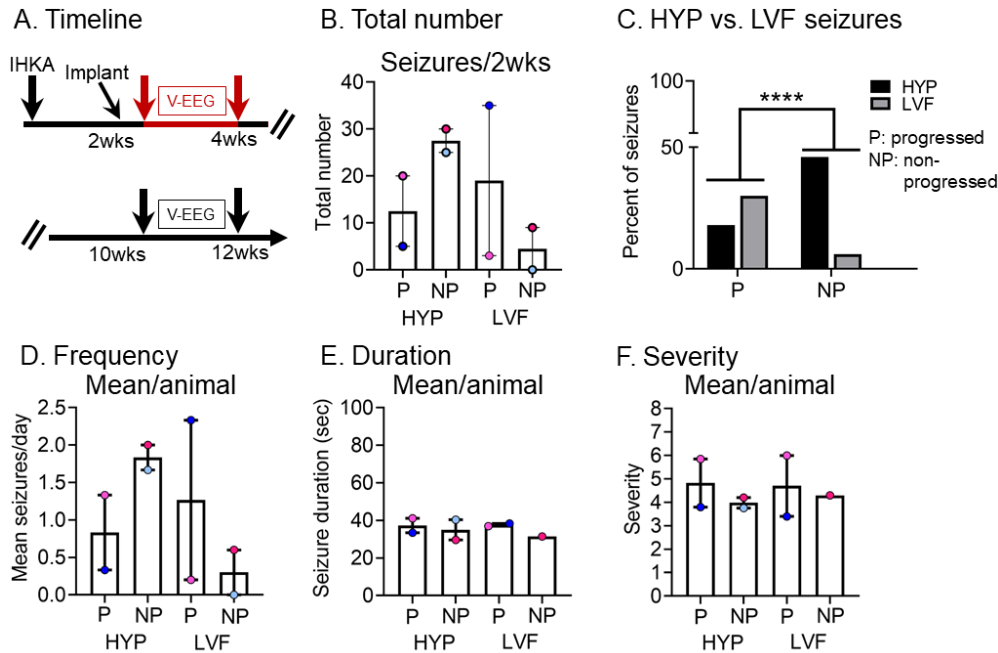

1558  
1559

**Supplemental Figure 5. Comparison of different convulsive seizure onset patterns in mice that did or did not show progression at 10-12 wks**

- (A) Experimental timeline of the study as shown before. Data from the early timepoint (red arrows) are used for this figure. The comparisons are between mice that did not “progress” (seizures were most frequent at 2-4 wks) and mice that “progressed” (seizures were most frequent at 10-12 wks). There were 2 mice/group. P, progressed; NP, non-progressed.
- (B) The total number of convulsive HYP and LVF seizures recorded during 2-4 wks is shown for two subsets of mice, those with seizures that increased between 2-4 wks and 10-12 wks (progressed, P) and those mice with seizures that decreased (non-progressed, NP). There were 4 mice (2 males, blue; 2 females, pink).
- (C) The percentages of HYP or LVF seizures at 2-4 wks were compared between P and NP mice. Mice that showed progression (P) had a significantly different proportion of HYP seizures relative to LVF seizures depending on their progression (P) or non-progression (NP; Fisher’s exact test,  $p < 0.0001$ ). The data support the view that HYP seizures dominated non-progressed mice but LVF were more prevalent in mice that progressed.
- (D) Same as B, but seizure frequency is shown.
- (E) Same as B, but seizure duration is plotted. Seizure duration was calculated as an average per animal.
- (F) Same as B, but seizure severity is shown. Convulsive seizure severity was calculated as an average per animal.

1560  
1561  
1562  
1563  
1564  
1565  
1566  
1567  
1568  
1569  
1570  
1571  
1572  
1573  
1574  
1575  
1576  
1577  
1578  
1579  
1580  
1581  
1582  
1583  
1584  
1585  
1586  
1587  
1588  
1589  
1590  
1591

1592 **REFERENCES**

1593

1594 Amiri, M., Lina, J. M., Pizzo, F., Gotman, J., 2016. High frequency oscillations and  
1595 spikes: Separating real hfos from false oscillations. *Clin Neurophysiol.* 127, 187-  
1596 196.

1597

1598 Arabadzisz, D., Antal, K., Parpan, F., Emri, Z., Fritschy, J. M., 2005. Epileptogenesis  
1599 and chronic seizures in a mouse model of temporal lobe epilepsy are associated  
1600 with distinct EEG patterns and selective neurochemical alterations in the  
1601 contralateral hippocampus. *Exp Neurol.* 194, 76-90.

1602

1603 Araki, T., Simon, R. P., Taki, W., Lan, J. Q., Henshall, D. C., 2002. Characterization of  
1604 neuronal death induced by focally evoked limbic seizures in the C57BL/6 mouse.  
1605 *J Neurosci Res.* 69, 614-621.

1606

1607 Avoli, M., de Curtis, M., Gnatkovsky, V., Gotman, J., Köhling, R., Lévesque, M.,  
1608 Manseau, F., Shiri, Z., Williams, S., 2016. Specific imbalance of  
1609 excitatory/inhibitory signaling establishes seizure onset pattern in temporal lobe  
1610 epilepsy. *J Neurophysiol.* 115, 3229-3237.

1611

1612 Bagshaw, A. P., Jacobs, J., LeVan, P., Dubeau, F., Gotman, J., 2009. Effect of sleep  
1613 stage on interictal high-frequency oscillations recorded from depth  
1614 macroelectrodes in patients with focal epilepsy. *Epilepsia.* 50, 617-628.

1615

1616 Balish, M., Albert, P. S., Theodore, W. H., 1991. Seizure frequency in intractable partial  
1617 epilepsy: A statistical analysis. *Epilepsia.* 32, 642-649.

1618

1619 Bauer, J., Burr, W., 2001. Course of chronic focal epilepsy resistant to anticonvulsant  
1620 treatment. *Seizure.* 10, 239-246.

1621

1622 Behr, C., Lévesque, M., Stroh, T., Avoli, M., 2017. Time-dependent evolution of  
1623 seizures in a model of mesial temporal lobe epilepsy. *Neurobiol Dis.* 106, 205-  
1624 213.

1625

1626 Ben-Ari, Y., Cossart, R., 2000. Kainate, a double agent that generates seizures: Two  
1627 decades of progress. *Trends Neurosci.* 23, 580-587.

1628

1629 Ben-Ari, Y., Lagowska, J., 1978. Epileptogenic action of intra-amygdaloid injection of  
1630 kainic acid. *C R Acad Hebd Seances Acad Sci D.* 287, 813-816.

1631

- 1632 Ben-Ari, Y., Tremblay, E., Ottersen, O. P., 1980. Injections of kainic acid into the  
1633 amygdaloid complex of the rat: An electrographic, clinical and histological study  
1634 in relation to the pathology of epilepsy. *Neuroscience*. 5, 515-528.  
1635
- 1636 Bénar, C. G., Chauvière, L., Bartolomei, F., Wendling, F., 2010. Pitfalls of high-pass  
1637 filtering for detecting epileptic oscillations: A technical note on "false" ripples. *Clin*  
1638 *Neurophysiol.* 121, 301-310.  
1639
- 1640 Bernard, C., 2019. On the interpretation of results obtained in singly housed animals.  
1641 *Epilepsia*. 60, 2013-2015.  
1642
- 1643 Bielefeld, P., Schouten, M., Meijer, G. M., Breuk, M. J., Geijtenbeek, K., Karayel, S.,  
1644 Tiaglik, A., Vuuregge, A. H., Willems, R. A. L., Witkamp, D., Lucassen, P. J.,  
1645 Encinas, J. M., Fitzsimons, C. P., 2019. Co-administration of anti microRNA-124  
1646 and -137 oligonucleotides prevents hippocampal neural stem cell loss upon non-  
1647 convulsive seizures. *Front Mol Neurosci*. 12, 31.  
1648
- 1649 Bielefeld, P., Sierra, A., Encinas, J. M., Maletic-Savatic, M., Anderson, A., Fitzsimons,  
1650 C. P., 2017. A standardized protocol for stereotaxic intrahippocampal  
1651 administration of kainic acid combined with electroencephalographic seizure  
1652 monitoring in mice. *Front Neurosci*. 11, 160.  
1653
- 1654 Blümcke, I., Coras, R., Miyata, H., Ozkara, C., 2012. Defining clinico-neuropathological  
1655 subtypes of mesial temporal lobe epilepsy with hippocampal sclerosis. *Brain*  
1656 *Pathol.* 22, 402-411.  
1657
- 1658 Botterill, J. J., Lu, Y. L., LaFrancois, J. J., Bernstein, H. L., Alcantara-Gonzalez, D., Jain,  
1659 S., Leary, P., Scharfman, H. E., 2019. An excitatory and epileptogenic effect of  
1660 dentate gyrus mossy cells in a mouse model of epilepsy. *Cell Rep*. 29, 2875-  
1661 2889.e2876.  
1662
- 1663 Bouilleret, V., Ridoux, V., Depaulis, A., Marescaux, C., Nehlig, A., Le Gal La Salle, G.,  
1664 1999. Recurrent seizures and hippocampal sclerosis following intrahippocampal  
1665 kainate injection in adult mice: Electroencephalography, histopathology and  
1666 synaptic reorganization similar to mesial temporal lobe epilepsy. *Neuroscience*.  
1667 89, 717-729.  
1668
- 1669 Bragin, A., Azizyan, A., Almajano, J., Wilson, C. L., Engel, J., 2005. Analysis of chronic  
1670 seizure onsets after intrahippocampal kainic acid injection in freely moving rats.  
1671 *Epilepsia*. 46, 1592-1598.  
1672

- 1673 Bragin, A., Engel, J., Jr., Wilson, C. L., Fried, I., Mathern, G. W., 1999a. Hippocampal  
1674 and entorhinal cortex high-frequency oscillations (100-500 Hz) in human epileptic  
1675 brain and in kainic acid-treated rats with chronic seizures. *Epilepsia*. 40, 127-137.  
1676
- 1677 Bragin, A., Engel, J., Wilson, C. L., Vizingin, E., Mathern, G. W., 1999b.  
1678 Electrophysiologic analysis of a chronic seizure model after unilateral  
1679 hippocampal KA injection. *Epilepsia*. 40, 1210-1221.  
1680
- 1681 Bragin, A., Li, L., Almajano, J., Alvarado-Rojas, C., Reid, A. Y., Staba, R. J., Engel, J.,  
1682 Jr., 2016. Pathologic electrographic changes after experimental traumatic brain  
1683 injury. *Epilepsia*. 57, 735-745.  
1684
- 1685 Bui, A. D., Nguyen, T. M., Limouse, C., Kim, H. K., Szabo, G. G., Felong, S., Maroso,  
1686 M., Soltesz, I., 2018. Dentate gyrus mossy cells control spontaneous convulsive  
1687 seizures and spatial memory. *Science*. 359, 787-790.  
1688
- 1689 Clayton, J. A., Collins, F. S., 2014. Policy: NIH to balance sex in cell and animal studies.  
1690 *Nature*. 509, 282-283.  
1691
- 1692 Dingledine, R., Varvel, N. H., Dudek, F. E., 2014. When and how do seizures kill  
1693 neurons, and is cell death relevant to epileptogenesis? *Adv Exp Med Biol*. 813,  
1694 109-122.  
1695
- 1696 Engel, J., Jr., Bragin, A., Staba, R., Mody, I., 2009. High-frequency oscillations: What is  
1697 normal and what is not? *Epilepsia*. 50, 598-604.  
1698
- 1699 Franklin, K. B. J., Paxinos, G., 1997. The mouse brain in stereotaxic coordinates.  
1700 *Academic Press*, San Diego.  
1701
- 1702 Frauscher, B., Bartolomei, F., Kobayashi, K., Cimbalnik, J., van 't Klooster, M. A.,  
1703 Rampp, S., Otsubo, H., Höller, Y., Wu, J. Y., Asano, E., Engel, J., Jr., Kahane,  
1704 P., Jacobs, J., Gotman, J., 2017. High-frequency oscillations: The state of clinical  
1705 research. *Epilepsia*. 58, 1316-1329.  
1706
- 1707 Gnatkovsky, V., Pelliccia, V., de Curtis, M., Tassi, L., 2019. Two main focal seizure  
1708 patterns revealed by intracerebral electroencephalographic biomarker analysis.  
1709 *Epilepsia*. 60, 96-106.  
1710
- 1711 Gunn, B. G., Baram, T. Z., 2017. Stress and seizures: Space, time and hippocampal  
1712 circuits. *Trends Neurosci*. 40, 667-679.

- 1713 Haas, C. A., Dudeck, O., Kirsch, M., Huszka, C., Kann, G., Pollak, S., Zentner, J.,  
1714 Frotscher, M., 2002. Role for reelin in the development of granule cell dispersion  
1715 in temporal lobe epilepsy. *J Neurosci.* 22, 5797-5802.  
1716
- 1717 Harte-Hargrove, L. C., Galanopoulou, A. S., French, J. A., Pitkänen, A., Whittemore, V.,  
1718 Scharfman, H. E., 2018. Common data elements (CDEs) for preclinical epilepsy  
1719 research: Introduction to CDEs and description of core CDEs. A TASK3 report of  
1720 the ILAE/AES joint translational task force. *Epilepsia Open.* 3, 13-23.  
1721
- 1722 Häussler, U., Bielefeld, L., Froriep, U. P., Wolfart, J., Haas, C. A., 2012. Septotemporal  
1723 position in the hippocampal formation determines epileptic and neurogenic  
1724 activity in temporal lobe epilepsy. *Cereb Cortex.* 22, 26-36.  
1725
- 1726 Häussler, U., Rinas, K., Kiliyas, A., Egert, U., Haas, C. A., 2016. Mossy fiber sprouting  
1727 and pyramidal cell dispersion in the hippocampal CA2 region in a mouse model  
1728 of temporal lobe epilepsy. *Hippocampus.* 26, 577-588.  
1729
- 1730 Henshall, D. C., Chapter 41 - Poststatus epilepticus models: Focal kainic acid. In: A.  
1731 Pitkänen, P. S. Buckmaster, A. S. Galanopoulou, S. L. Moshé, (Eds.), Models of  
1732 Seizures and Epilepsy (second edition). *Academic Press*, 2017, pp. 611-624.  
1733
- 1734 Henshall, D. C., Sinclair, J., Simon, R. P., 2000. Spatio-temporal profile of DNA  
1735 fragmentation and its relationship to patterns of epileptiform activity following  
1736 focally evoked limbic seizures. *Brain Res.* 858, 290-302.  
1737
- 1738 Hitti, F. L., Siegelbaum, S. A., 2014. The hippocampal CA2 region is essential for social  
1739 memory. *Nature.* 508, 88-92.  
1740
- 1741 Holmes, G. L., 2007. Animal model studies application to human patients. *Neurology.*  
1742 69, S28-32.  
1743
- 1744 Houser, C. R., 1990. Granule cell dispersion in the dentate gyrus of humans with  
1745 temporal lobe epilepsy. *Brain Res.* 535, 195-204.  
1746
- 1747 Houser, C. R., 1992. Morphological changes in the dentate gyrus in human temporal  
1748 lobe epilepsy. *Epilepsy Res Suppl.* 7, 223-234.  
1749
- 1750 Houser, C. R., 1999. Neuronal loss and synaptic reorganization in temporal lobe  
1751 epilepsy. *Adv Neurol.* 79, 743-761.  
1752



- 1753 Iyengar, S. S., LaFrancois, J. J., Friedman, D., Drew, L. J., Denny, C. A., Burghardt, N.  
1754 S., Wu, M. V., Hsieh, J., Hen, R., Scharfman, H. E., 2015. Suppression of adult  
1755 neurogenesis increases the acute effects of kainic acid. *Exp Neurol.* 264, 135-  
1756 149.  
1757
- 1758 Jacobs, J., LeVan, P., Chander, R., Hall, J., Dubeau, F., Gotman, J., 2008. Interictal  
1759 high-frequency oscillations (80-500 Hz) are an indicator of seizure onset areas  
1760 independent of spikes in the human epileptic brain. *Epilepsia.* 49, 1893-1907.  
1761
- 1762 Jain, S., LaFrancois, J. J., Botterill, J. J., Alcantara-Gonzalez, D., Scharfman, H. E.,  
1763 2019. Adult neurogenesis in the mouse dentate gyrus protects the hippocampus  
1764 from neuronal injury following severe seizures. *Hippocampus.* 29, 683-709.  
1765
- 1766 Jenssen, S., Gracely, E. J., Sperling, M. R., 2006. How long do most seizures last? A  
1767 systematic comparison of seizures recorded in the epilepsy monitoring unit.  
1768 *Epilepsia.* 47, 1499-1503.  
1769
- 1770 Kapur, J., Elm, J., Chamberlain, J. M., Barsan, W., Cloyd, J., Lowenstein, D., Shinnar,  
1771 S., Conwit, R., Meinzer, C., Cock, H., Fountain, N., Connor, J. T., Silbergleit, R.,  
1772 2019. Randomized trial of three anticonvulsant medications for status epilepticus.  
1773 *N Engl J Med.* 381, 2103-2113.  
1774
- 1775 Keezer, M. R., Sisodiya, S. M., Sander, J. W., 2016. Comorbidities of epilepsy: Current  
1776 concepts and future perspectives. *Lancet Neurol.* 15, 106-115.  
1777
- 1778 Kiasalari, Z., Khalili, M., Shafiee, S., Roghani, M., 2016. The effect of vitamin E on  
1779 learning and memory deficits in intrahippocampal kainate-induced temporal lobe  
1780 epilepsy in rats. *Indian J Pharmacol.* 48, 11-14.  
1781
- 1782 Kim, J. Y., Kim, J. H., Lee, H. J., Kim, S. H., Jung, Y. J., Lee, H. Y., Kim, H. J., Kim, S.  
1783 Y., 2018. Antiepileptic and anti-neuroinflammatory effects of red ginseng in an  
1784 intrahippocampal kainic acid model of temporal lobe epilepsy demonstrated by  
1785 electroencephalography. *Yeungnam Univ J Med.* 35, 192-198.  
1786
- 1787 Kim, T. H., Richards, K., Heng, J., Petrou, S., Reid, C. A., 2013. Two lines of transgenic  
1788 mice expressing cre-recombinase exhibit increased seizure susceptibility.  
1789 *Epilepsy Res.* 104, 11-16.  
1790
- 1791 Klimes, P., Cimbalnik, J., Brazdil, M., Hall, J., Dubeau, F., Gotman, J., Frauscher, B.,  
1792 2019. NREM sleep is the state of vigilance that best identifies the epileptogenic  
1793 zone in the interictal electroencephalogram. *Epilepsia.* 60, 2404-2415.  
1794

- 1795 Kobow, K., Jeske, I., Hildebrandt, M., Hauke, J., Hahnen, E., Buslei, R., Buchfelder, M.,  
1796 Weigel, D., Stefan, H., Kasper, B., Pauli, E., Blümcke, I., 2009. Increased reelin  
1797 promoter methylation is associated with granule cell dispersion in human  
1798 temporal lobe epilepsy. *J Neuropathol Exp Neurol.* 68, 356-364.  
1799
- 1800 Kwan, P., Schachter, S. C., Brodie, M. J., 2011. Drug-resistant epilepsy. *N Engl J Med.*  
1801 365, 919-926.  
1802
- 1803 Lai, M. C., Wu, S. N., Huang, C. W., 2020. The specific effects of OD-1, a peptide  
1804 activator, on voltage-gated sodium current and seizure susceptibility. *Int J Mol*  
1805 *Sci.* 21.  
1806
- 1807 Lang, J. D., Taylor, D. C., Kasper, B. S., 2018. Stress, seizures, and epilepsy: Patient  
1808 narratives. *Epilepsy Behav.* 80, 163-172.  
1809
- 1810 Lévesque, M., Avoli, M., 2013. The kainic acid model of temporal lobe epilepsy.  
1811 *Neurosci Biobehav Rev.* 37, 2887-2899.  
1812
- 1813 Lévesque, M., Salami, P., Gotman, J., Avoli, M., 2012. Two seizure-onset types reveal  
1814 specific patterns of high-frequency oscillations in a model of temporal lobe  
1815 epilepsy. *J Neurosci.* 32, 13264-13272.  
1816
- 1817 Li, J., Levertson, L. K., Naganatanahalli, L. M., Christian-Hinman, C. A., 2020. Seizure  
1818 burden fluctuates with the female reproductive cycle in a mouse model of chronic  
1819 temporal lobe epilepsy. *Exp Neurol.* 334, 113492.  
1820
- 1821 Li, L., Kriukova, K., Engel, J., Bragin, A., 2018. Seizure development in the acute  
1822 intrahippocampal epileptic focus. *Scientific Reports.* 8.  
1823
- 1824 Löscher, W., 2017. Animal models of seizures and epilepsy: Past, present, and future  
1825 role for the discovery of antiseizure drugs. *Neurochem Res.* 42, 1873-1888.  
1826
- 1827 MacKenzie, G., Maguire, J., 2015. Chronic stress shifts the GABA reversal potential in  
1828 the hippocampus and increases seizure susceptibility. *Epilepsy Res.* 109, 13-27.  
1829
- 1830 Manouze, H., Ghestem, A., Poillerat, V., Bennis, M., Ba-M'hamed, S., Benoliel, J. J.,  
1831 Becker, C., Bernard, C., 2019. Effects of single cage housing on stress,  
1832 cognitive, and seizure parameters in the rat and mouse pilocarpine models of  
1833 epilepsy. *eNeuro.* 6.  
1834

- 1835 Maroso, M., Balosso, S., Ravizza, T., Iori, V., Wright, C. I., French, J., Vezzani, A.,  
1836 2011. Interleukin-1 $\beta$  biosynthesis inhibition reduces acute seizures and drug  
1837 resistant chronic epileptic activity in mice. *Neurotherapeutics*. 8, 304-315.  
1838
- 1839 McKhann, G. M., 2nd, Wenzel, H. J., Robbins, C. A., Sosunov, A. A., Schwartzkroin, P.  
1840 A., 2003. Mouse strain differences in kainic acid sensitivity, seizure behavior,  
1841 mortality, and hippocampal pathology. *Neuroscience*. 122, 551-561.  
1842
- 1843 Meier, C. L., Dudek, F. E., 1996. Spontaneous and stimulation-induced synchronized  
1844 burst afterdischarges in the isolated CA1 of kainate-treated rats. *J Neurophysiol*.  
1845 76, 2231-2239.  
1846
- 1847 Menendez de la Prida, L., Staba, R. J., Dian, J. A., 2015. Conundrums of high-  
1848 frequency oscillations (80-800 Hz) in the epileptic brain. *J Clin Neurophysiol*. 32,  
1849 207-219.  
1850
- 1851 Nadler, J. V., 1981. Minireview. Kainic acid as a tool for the study of temporal lobe  
1852 epilepsy. *Life Sci*. 29, 2031-2042.  
1853
- 1854 Nadler, J. V., Perry, B. W., Cotman, C. W., 1978. Intraventricular kainic acid  
1855 preferentially destroys hippocampal pyramidal cells. *Nature*. 271, 676-677.  
1856
- 1857 Navarrete, M., Alvarado-Rojas, C., Le Van Quyen, M., Valderrama, M., 2016.  
1858 RIPPLELAB: A comprehensive application for the detection, analysis and  
1859 classification of high frequency oscillations in electroencephalographic signals.  
1860 *PLoS One*. 11, e0158276.  
1861
- 1862 Pearce, P. S., Friedman, D., Lafrancois, J. J., Iyengar, S. S., Fenton, A. A., Maclusky,  
1863 N. J., Scharfman, H. E., 2014. Spike-wave discharges in adult Sprague-Dawley  
1864 rats and their implications for animal models of temporal lobe epilepsy. *Epilepsy*  
1865 *Behav*. 32, 121-131.  
1866
- 1867 Perucca, P., Dubeau, F., Gotman, J., 2014. Intracranial electroencephalographic  
1868 seizure-onset patterns: Effect of underlying pathology. *Brain*. 137, 183-196.  
1869
- 1870 Pinel, J. P., Rovner, L. I., 1978. Electrode placement and kindling-induced experimental  
1871 epilepsy. *Exp Neurol*. 58, 335-346.  
1872
- 1873 Pitkänen, A., Buckmaster, P. S., Galanopoulou, A. S., Moshé, S. L., 2017. Models of  
1874 Seizures and Epilepsy (second edition). *Academic Press*.  
1875

- 1876 Racine, R. J., 1972. Modification of seizure activity by electrical stimulation. I. After-  
1877 discharge threshold. *Electroencephalogr Clin Neurophysiol.* 32, 269-279.  
1878
- 1879 Rattka, M., Brandt, C., Löscher, W., 2013. The intrahippocampal kainate model of  
1880 temporal lobe epilepsy revisited: Epileptogenesis, behavioral and cognitive  
1881 alterations, pharmacological response, and hippocampal damage in epileptic  
1882 rats. *Epilepsy Res.* 103, 135-152.  
1883
- 1884 Ravizza, T., Onat, F. Y., Brooks-Kayal, A. R., Depaulis, A., Galanopoulou, A. S.,  
1885 Mazarati, A., Numis, A. L., Sankar, R., Friedman, A., 2017. WONOEP appraisal:  
1886 Biomarkers of epilepsy-associated comorbidities. *Epilepsia.* 58, 331-342.  
1887
- 1888 Riban, V., Bouilleret, V., Pham-Lê, B. T., Fritschy, J. M., Marescaux, C., Depaulis, A.,  
1889 2002. Evolution of hippocampal epileptic activity during the development of  
1890 hippocampal sclerosis in a mouse model of temporal lobe epilepsy.  
1891 *Neuroscience.* 112, 101-111.  
1892
- 1893 Runtz, L., Girard, B., Toussenot, M., Espallergues, J., Fayd'Herbe De Maudave, A.,  
1894 Milman, A., deBock, F., Ghosh, C., Guerineau, N. C., Pascussi, J. M., Bertaso,  
1895 F., Marchi, N., 2018. Hepatic and hippocampal cytochrome P450 enzyme  
1896 overexpression during spontaneous recurrent seizures. *Epilepsia.* 59, 123-134.  
1897
- 1898 Rusina, E., Bernard, C., Williamson, A., 2021. The kainic acid models of temporal lobe  
1899 epilepsy. *eNeuro.* 8.  
1900
- 1901 Saggio, M. L., Crisp, D., Scott, J. M., Karoly, P., Kuhlmann, L., Nakatani, M., Murai, T.,  
1902 Dümpelmann, M., Schulze-Bonhage, A., Ikeda, A., Cook, M., Gliske, S. V., Lin,  
1903 J., Bernard, C., Jirsa, V., Stacey, W. C., 2020. A taxonomy of seizure  
1904 dynamotypes. *Elife.* 9.  
1905
- 1906 Salami, P., Lévesque, M., Gotman, J., Avoli, M., 2015. Distinct EEG seizure patterns  
1907 reflect different seizure generation mechanisms. *J Neurophysiol.* 113, 2840-  
1908 2844.  
1909
- 1910 Sandau, U. S., Yahya, M., Bigej, R., Friedman, J. L., Saleumvong, B., Boison, D., 2019.  
1911 Transient use of a systemic adenosine kinase inhibitor attenuates epilepsy  
1912 development in mice. *Epilepsia.* 60, 615-625.  
1913
- 1914 Scharfman, H. E., 2007. The neurobiology of epilepsy. *Current Neurology and*  
1915 *Neuroscience Reports.* 7, 348-354.  
1916

- 1917 Scharfman, H. E., Galanopoulou, A. S., French, J. A., Pitkänen, A., Whittemore, V.,  
1918 Harte-Hargrove, L. C., 2018. Preclinical common data elements (CDEs) for  
1919 epilepsy: A joint ILAE/AES and NINDS translational initiative. *Epilepsia Open*. 3,  
1920 9-12.  
1921
- 1922 Scharfman, H. E., Goodman, J. H., Sollas, A. L., 2000. Granule-like neurons at the  
1923 hilar/CA3 border after status epilepticus and their synchrony with area CA3  
1924 pyramidal cells: Functional implications of seizure-induced neurogenesis. *J*  
1925 *Neurosci*. 20, 6144-6158.  
1926
- 1927 Scharfman, H. E., Pedley, T. A., Temporal lobe epilepsy. In: Gilman, A., (Ed.), In the  
1928 Neurobiology of Disease. *Academic Press*, New York, 2006.  
1929
- 1930 Scharfman, H. E., Sollas, A. L., Smith, K. L., Jackson, M. B., Goodman, J. H., 2002.  
1931 Structural and functional asymmetry in the normal and epileptic rat dentate gyrus.  
1932 *J Comp Neurol*. 454, 424-439.  
1933
- 1934 Schauwecker, P. E., Steward, O., 1997. Genetic determinants of susceptibility to  
1935 excitotoxic cell death: Implications for gene targeting approaches. *Proc Natl Acad*  
1936 *Sci U S A*. 94, 4103-4108.  
1937
- 1938 Schwarcz, R., Zaczek, R., Coyle, J. T., 1978. Microinjection of kainic acid into the rat  
1939 hippocampus. *Eur J Pharmacol*. 50, 209-220.  
1940
- 1941 Sheybani, L., Birot, G., Contestabile, A., Seeck, M., Kiss, J. Z., Schaller, K., Michel, C.  
1942 M., Quairiaux, C., 2018. Electrophysiological evidence for the development of a  
1943 self-sustained large-scale epileptic network in the kainate mouse model of  
1944 temporal lobe epilepsy. *J Neurosci*. 38, 3776-3791.  
1945
- 1946 Shiri, Z., Manseau, F., Lévesque, M., Williams, S., Avoli, M., 2016. Activation of specific  
1947 neuronal networks leads to different seizure onset types. *Ann Neurol*. 79, 354-  
1948 365.  
1949
- 1950 So, N. K., Blume, W. T., 2010. The postictal EEG. *Epilepsy Behav*. 19, 121-126.  
1951
- 1952 Staba, R. J., Wilson, C. L., Bragin, A., Fried, I., Engel, J., Jr., 2002. Quantitative  
1953 analysis of high-frequency oscillations (80-500 Hz) recorded in human epileptic  
1954 hippocampus and entorhinal cortex. *J Neurophysiol*. 88, 1743-1752.  
1955

- 1956 Staba, R. J., Wilson, C. L., Bragin, A., Jhung, D., Fried, I., Engel, J., Jr., 2004. High-  
1957 frequency oscillations recorded in human medial temporal lobe during sleep. *Ann*  
1958 *Neurol.* 56, 108-115.  
1959
- 1960 Sutula, T. P., Pitkänen, A., 2002. Do seizures damage the brain? *Elsevier*, New York.  
1961
- 1962 Suzuki, F., Junier, M. P., Guilhem, D., Sorensen, J. C., Onteniente, B., 1995.  
1963 Morphogenetic effect of kainate on adult hippocampal neurons associated with a  
1964 prolonged expression of brain-derived neurotrophic factor. *Neuroscience.* 64,  
1965 665-674.  
1966
- 1967 Thijs, R. D., Surges, R., O'Brien, T. J., Sander, J. W., 2019. Epilepsy in adults. *Lancet.*  
1968 393, 689-701.  
1969
- 1970 Thom, M., 2014. Review: Hippocampal sclerosis in epilepsy: A neuropathology review.  
1971 *Neuropathol Appl Neurobiol.* 40, 520-543.  
1972
- 1973 Thomson, K. E., West, P. J., Metcalf, C. S., Wilcox, K. S., 2021. Response: Usefulness  
1974 of the post-kainate spontaneous recurrent seizure model for screening for  
1975 antiseizure and for neuroprotective effects. *Epilepsia.*  
1976
- 1977 Velasco, A. L., Wilson, C. L., Babb, T. L., Engel, J., Jr., 2000. Functional and anatomic  
1978 correlates of two frequently observed temporal lobe seizure-onset patterns.  
1979 *Neural Plast.* 7, 49-63.  
1980
- 1981 VonDran, M. W., LaFrancois, J., Padow, V. A., Friedman, W. J., Scharfman, H. E.,  
1982 Milner, T. A., Hempstead, B. L., 2014. p75NTP, but not proNGF, is upregulated  
1983 following status epilepticus in mice. *ASN Neuro.* 6.  
1984
- 1985 Weiss, S. A., Alvarado-Rojas, C., Bragin, A., Behnke, E., Fields, T., Fried, I., Engel, J.,  
1986 Jr., Staba, R., 2016. Ictal onset patterns of local field potentials, high frequency  
1987 oscillations, and unit activity in human mesial temporal lobe epilepsy. *Epilepsia.*  
1988 57, 111-121.  
1989
- 1990 Welzel, L., Schidlitzki, A., Twele, F., Anjum, M., Löscher, W., 2019. A face-to-face  
1991 comparison of the intra-amygdala and intrahippocampal kainate mouse models  
1992 of mesial temporal lobe epilepsy and their utility for testing novel therapies.  
1993 *Epilepsia.*  
1994

- 1995 Williams, P. A., Hellier, J. L., White, A. M., Staley, K. J., Dudek, F. E., 2007.  
1996 Development of spontaneous seizures after experimental status epilepticus:  
1997 Implications for understanding epileptogenesis. *Epilepsia*. 48 Suppl 5, 157-163.  
1998
- 1999 Zaher, N., Urban, A., Antony, A., Plummer, C., Bagić, A., Richardson, R. M., Kokkinos,  
2000 V., 2020. Ictal onset signatures predict favorable outcomes of laser thermal  
2001 ablation for mesial temporal lobe epilepsy. *Front Neurol*. 11, 595454.  
2002
- 2003 Zeidler, Z., Brandt-Fontaine, M., Leintz, C., Krook-Magnuson, C., Netoff, T., Krook-  
2004 Magnuson, E., 2018. Targeting the mouse ventral hippocampus in the  
2005 intrahippocampal kainic acid model of temporal lobe epilepsy. *eneuro*. 5,  
2006 ENEURO.0158-0118.  
2007
- 2008 Zhu, H., Zhao, Y., Wu, H., Jiang, N., Wang, Z., Lin, W., Jin, J., Ji, Y., 2016. Remarkable  
2009 alterations of Nav1.6 in reactive astrogliosis during epileptogenesis. *Sci Rep*. 6,  
2010 38108.  
2011
- 2012 Zijlmans, M., Jiruska, P., Zelmann, R., Leijten, F. S., Jefferys, J. G., Gotman, J., 2012.  
2013 High-frequency oscillations as a new biomarker in epilepsy. *Ann Neurol*. 71, 169-  
2014 178.  
2015
- 2016 Zijlmans, M., Zweiphenning, W., van Klink, N., 2019. Changing concepts in presurgical  
2017 assessment for epilepsy surgery. *Nat Rev Neurol*. 15, 594-606.  
2018
- 2019 Zimmermann, G., Trinka, E., 2020. Accounting for individual variability in baseline  
2020 seizure frequencies when planning randomized clinical trials remains  
2021 challenging. *Epilepsia*.  
2022
